# Supplementary material for: New dimeric chromanone derivatives from the mutant strains of Penicillium oxalicum and their bioactivities
Source: Royal Society of Chemistry journal article supplement (doi:10.1039/d2ra02639b), 2022-01-01
Supplement: d2ra02639b1.pdf [file d2ra02639b1.pdf]

## Supporting Information of

### **New dimeric chromanone derivatives from the mutant strains of *Penicillium oxalicum* and their bioactivities**

Guowei Gu,<sup>‡a</sup> Tao Zhang,<sup>‡a</sup> Jianyuan Zhao,<sup>a</sup> Wuli Zhao,<sup>a</sup> Yan Tang,<sup>ab</sup> Lu Wang,<sup>a</sup> Shan Cen,<sup>a</sup> Liyan Yu<sup>\*a</sup> and Dewu Zhang<sup>\*a</sup>

<sup>a</sup>*Institute of Medicinal Biotechnology, Chinese Academy of Medical Sciences and Peking Union Medical College, Beijing 100050, P. R. China*

<sup>b</sup>*School of Pharmacy, Yantai University, Yantai 264005, P. R. China*

<sup>‡</sup>These authors have contributed equally to this work.

<sup>\*</sup>To whom correspondence should be addressed.

E-mail: yly@cpcc.ac.cn; zhangdewuever@163.com

## Contents

|                                                                                                                                                                        |            |
|------------------------------------------------------------------------------------------------------------------------------------------------------------------------|------------|
| <b>Figure S1.</b> Structures of <b>1Aa–1Ac</b> .....                                                                                                                   | <b>S4</b>  |
| <b>Figure S2.</b> The optimized conformers and equilibrium populations of <b>1Aa</b> .....                                                                             | <b>S4</b>  |
| <b>Figure S3.</b> Structures of <b>1a–1d</b> .....                                                                                                                     | <b>S4</b>  |
| <b>Figure S4.</b> Structures of <b>2a–2d</b> .....                                                                                                                     | <b>S5</b>  |
| <b>Figure S5.</b> Structures of <b>3Aa</b> and <b>3Ab</b> .....                                                                                                        | <b>S5</b>  |
| <b>Figure S6.</b> The optimized conformers and equilibrium populations of <b>3Aa</b> .....                                                                             | <b>S5</b>  |
| <b>Figure S7.</b> Structures of <b>3a</b> and <b>3b</b> .....                                                                                                          | <b>S6</b>  |
| <b>Table S1.</b> Experimental $^{13}\text{C}$ NMR data of <b>1</b> and calculated $^{13}\text{C}$ NMR data of <b>1a–1d</b> in DMSO.....                                | <b>S6</b>  |
| <b>Table S2.</b> Experimental $^1\text{H}$ NMR data of <b>1</b> and calculated $^1\text{H}$ NMR data of <b>1a–1d</b> in DMSO.....                                      | <b>S7</b>  |
| <b>Table S3.</b> Statistical parameters of calculated $^1\text{H}$ and $^{13}\text{C}$ NMR data of <b>1a–1d</b> against experimental data of <b>1</b> .....            | <b>S7</b>  |
| <b>Table S4.</b> Experimental $^{13}\text{C}$ NMR data of <b>2</b> and calculated $^{13}\text{C}$ NMR data of <b>2a–2d</b> in Chloroform.....                          | <b>S8</b>  |
| <b>Table S5.</b> Experimental $^1\text{H}$ NMR data of <b>2</b> and calculated $^1\text{H}$ NMR data of <b>2a–2d</b> in Chloroform.....                                | <b>S9</b>  |
| <b>Table S6.</b> Statistical parameters of calculated $^1\text{H}$ and $^{13}\text{C}$ NMR data of <b>2a–2d</b> against experimental data of <b>2</b> .....            | <b>S9</b>  |
| <b>Figure S8.</b> Detailed DP4+ probability analysis for <b>2</b> .....                                                                                                | <b>S10</b> |
| <b>Table S7.</b> Experimental $^{13}\text{C}$ NMR data of <b>3</b> and calculated $^{13}\text{C}$ NMR data of <b>3a</b> and <b>3b</b> in DMSO.....                     | <b>S11</b> |
| <b>Table S8.</b> Experimental $^1\text{H}$ NMR data of <b>3</b> and calculated $^1\text{H}$ NMR data of <b>3a</b> and <b>3b</b> in DMSO.....                           | <b>S12</b> |
| <b>Table S9.</b> Statistical parameters of calculated $^1\text{H}$ and $^{13}\text{C}$ NMR data of <b>3a</b> and <b>3b</b> against experimental data of <b>3</b> ..... | <b>S12</b> |
| <b>Table S10.</b> $^{13}\text{C}$ NMR data of <b>5</b> and <b>6</b> .....                                                                                              | <b>S13</b> |
| <b>Table S11.</b> $^1\text{H}$ NMR data of <b>5</b> and <b>6</b> .....                                                                                                 | <b>S14</b> |
| <b>Figure S9.</b> Structures of chromanone dimers with 4–4' linkage.....                                                                                               | <b>S14</b> |
| <b>Table S12.</b> $^1\text{H}$ NMR data of chromanone dimers with 4–4' linkage.....                                                                                    | <b>S15</b> |
| <b>Table S13.</b> $^{13}\text{C}$ NMR data of chromanone dimers with 4–4' linkage.....                                                                                 | <b>S16</b> |
| <b>Table S14.</b> Cytotoxic activities against MIA-PaCa-2 cell line of <b>1–13</b> .....                                                                               | <b>S17</b> |
| <b>Table S15.</b> Antibacterial activities (MIC, $\mu\text{g}/\text{mL}$ ) of <b>1–13</b> .....                                                                        | <b>S17</b> |

|                                                                                                 |            |
|-------------------------------------------------------------------------------------------------|------------|
| <b>Figure S10.</b> $^1\text{H}$ NMR spectrum of <b>1</b> in $\text{DMSO-}d_6$ .....             | <b>S18</b> |
| <b>Figure S11.</b> $^{13}\text{C}$ NMR spectrum of <b>1</b> in $\text{DMSO-}d_6$ .....          | <b>S18</b> |
| <b>Figure S12.</b> DEPT spectra of <b>1</b> in $\text{DMSO-}d_6$ .....                          | <b>S19</b> |
| <b>Figure S13.</b> $^1\text{H-}^1\text{H}$ COSY spectrum of <b>1</b> in $\text{DMSO-}d_6$ ..... | <b>S19</b> |
| <b>Figure S14.</b> HSQC spectrum of <b>1</b> in $\text{DMSO-}d_6$ .....                         | <b>S20</b> |
| <b>Figure S15.</b> HMBC spectrum of <b>1</b> in $\text{DMSO-}d_6$ .....                         | <b>S20</b> |
| <b>Figure S16.</b> NOESY spectrum of <b>1</b> in $\text{DMSO-}d_6$ .....                        | <b>S21</b> |
| <b>Figure S17.</b> HRESIMS spectrum of <b>1</b> .....                                           | <b>S21</b> |
| <b>Figure S18.</b> IR spectrum of <b>1</b> .....                                                | <b>S22</b> |
| <b>Figure S19.</b> UV spectrum of <b>1</b> .....                                                | <b>S22</b> |
| <b>Figure S20.</b> ECD spectrum of <b>1</b> .....                                               | <b>S22</b> |
| <b>Figure S21.</b> $^1\text{H}$ NMR spectrum of <b>2</b> in $\text{CDCl}_3$ .....               | <b>S23</b> |
| <b>Figure S22.</b> $^{13}\text{C}$ NMR spectrum of <b>2</b> in $\text{CDCl}_3$ .....            | <b>S23</b> |
| <b>Figure S23.</b> DEPT spectra of <b>2</b> in $\text{CDCl}_3$ .....                            | <b>S24</b> |
| <b>Figure S24.</b> $^1\text{H-}^1\text{H}$ COSY spectrum of <b>2</b> in $\text{CDCl}_3$ .....   | <b>S24</b> |
| <b>Figure S25.</b> HSQC spectrum of <b>2</b> in $\text{CDCl}_3$ .....                           | <b>S25</b> |
| <b>Figure S26.</b> HMBC spectrum of <b>2</b> in $\text{CDCl}_3$ .....                           | <b>S25</b> |
| <b>Figure S27.</b> NOESY spectrum of <b>2</b> in $\text{CDCl}_3$ .....                          | <b>S26</b> |
| <b>Figure S28.</b> HRESIMS spectrum of <b>2</b> .....                                           | <b>S26</b> |
| <b>Figure S29.</b> IR spectrum of <b>2</b> .....                                                | <b>S27</b> |
| <b>Figure S30.</b> UV spectrum of <b>2</b> .....                                                | <b>S27</b> |
| <b>Figure S31.</b> ECD spectrum of <b>2</b> .....                                               | <b>S27</b> |
| <b>Figure S32.</b> $^1\text{H}$ NMR spectrum of <b>3</b> in $\text{DMSO-}d_6$ .....             | <b>S28</b> |
| <b>Figure S33.</b> $^{13}\text{C}$ NMR spectrum of <b>3</b> in $\text{DMSO-}d_6$ .....          | <b>S28</b> |
| <b>Figure S34.</b> DEPT spectra of <b>3</b> in $\text{DMSO-}d_6$ .....                          | <b>S29</b> |
| <b>Figure S35.</b> $^1\text{H-}^1\text{H}$ COSY spectrum of <b>3</b> in $\text{DMSO-}d_6$ ..... | <b>S29</b> |
| <b>Figure S36.</b> HSQC spectrum of <b>3</b> in $\text{DMSO-}d_6$ .....                         | <b>S30</b> |
| <b>Figure S37.</b> HMBC spectrum of <b>3</b> in $\text{DMSO-}d_6$ .....                         | <b>S30</b> |
| <b>Figure S38.</b> NOESY spectrum of <b>3</b> in $\text{DMSO-}d_6$ .....                        | <b>S31</b> |
| <b>Figure S39.</b> HRESIMS spectrum of <b>3</b> .....                                           | <b>S31</b> |
| <b>Figure S40.</b> IR spectrum of <b>3</b> .....                                                | <b>S32</b> |
| <b>Figure S41.</b> UV spectrum of <b>3</b> .....                                                | <b>S32</b> |
| <b>Figure S42.</b> ECD spectrum of <b>3</b> .....                                               | <b>S32</b> |

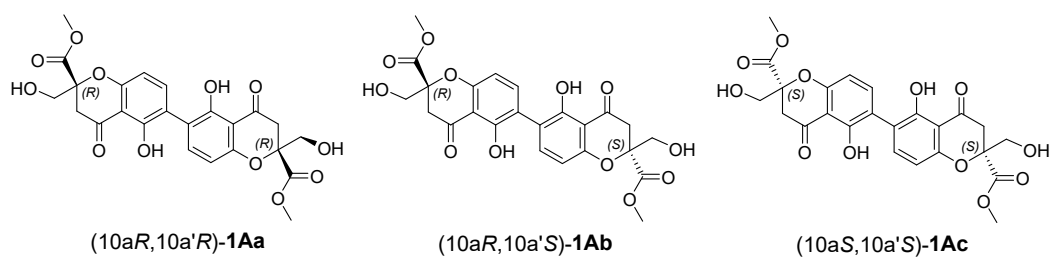

**Figure S1.** Structures of **1Aa–1Ac**

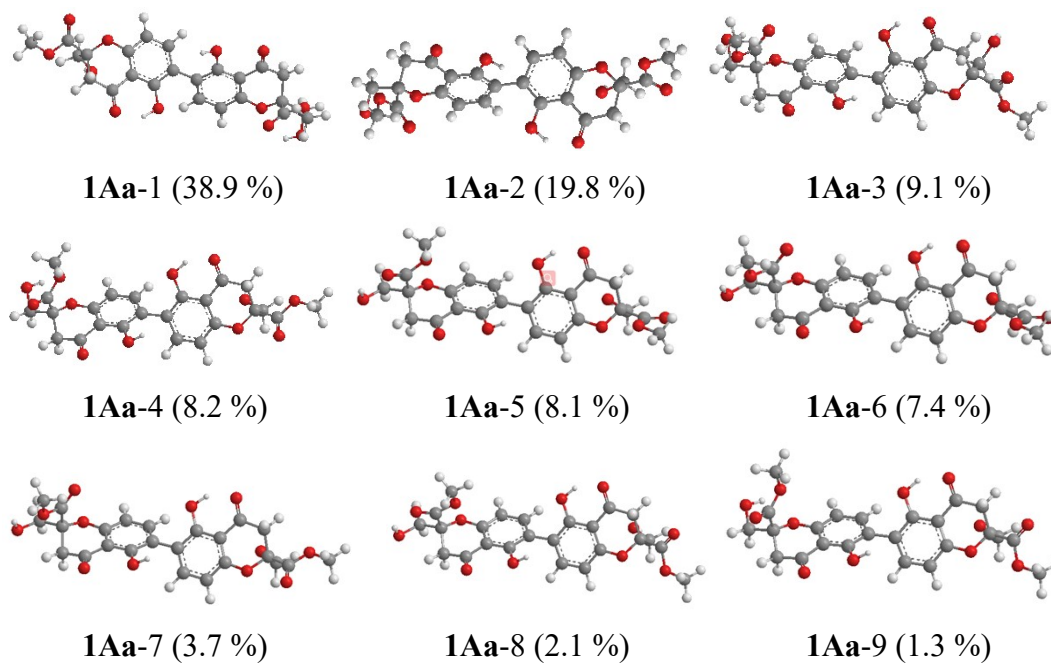

**Figure S2.** The optimized conformers and equilibrium populations of **1Aa**

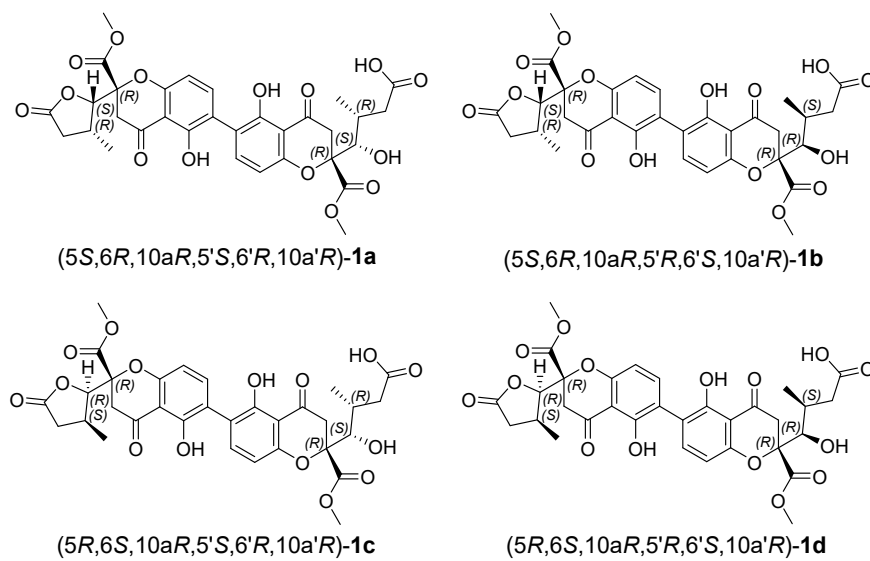

**Figure S3.** Structures of **1a–1d**

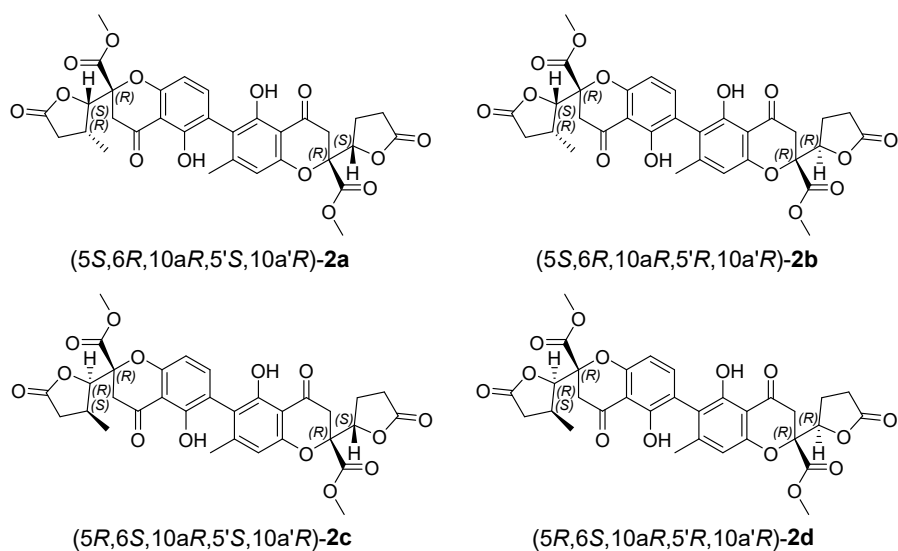

**Figure S4.** Structures of **2a–2d**

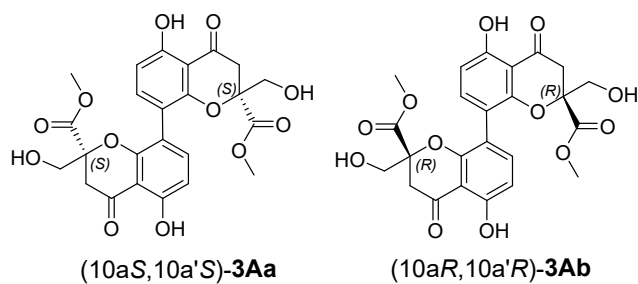

**Figure S5.** Structures of **3Aa** and **3Ab**

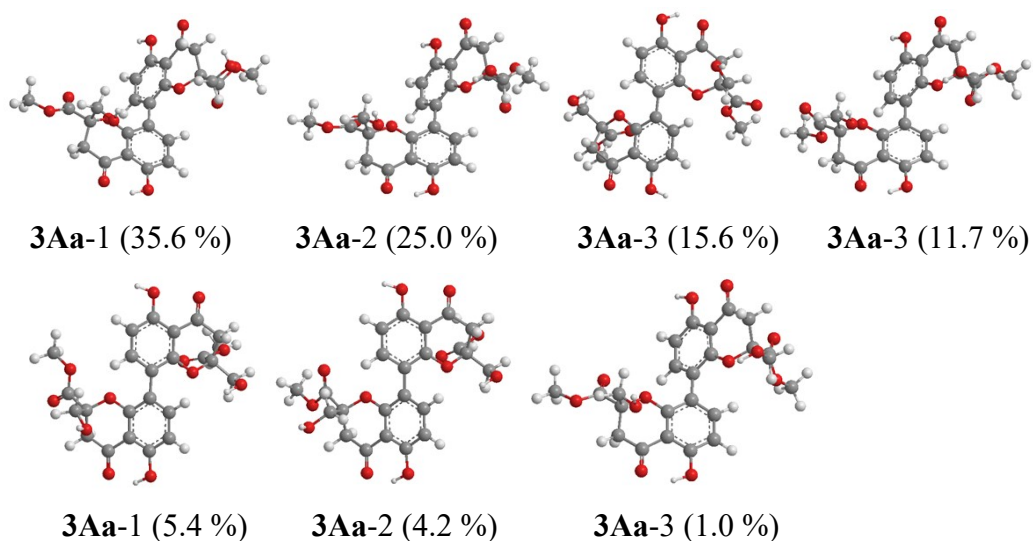

**Figure S6.** The optimized conformers and equilibrium populations of **3Aa**

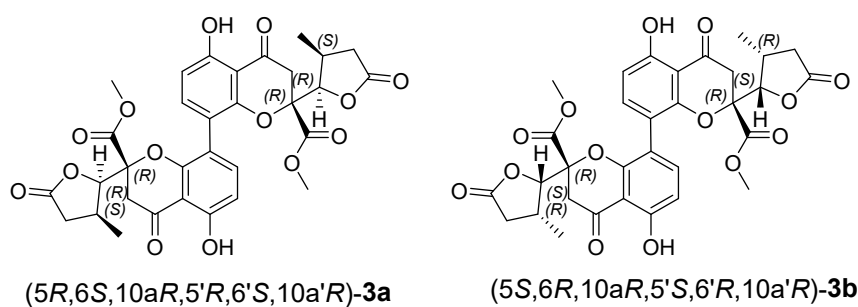

**Figure S7.** Structures of **3a** and **3b**

**Table S1.** Experimental  $^{13}\text{C}$  NMR data of **1** and calculated  $^{13}\text{C}$  NMR data of **1a–1d** in DMSO

| no.  | <b>1</b>              | <b>1a</b>           |                           | <b>1b</b>           |                           | <b>1c</b>           |                           | <b>1d</b>           |                           |
|------|-----------------------|---------------------|---------------------------|---------------------|---------------------------|---------------------|---------------------------|---------------------|---------------------------|
|      | $\delta_{\text{exp}}$ | $\delta_{\text{C}}$ | $\Delta\delta_{\text{C}}$ | $\delta_{\text{C}}$ | $\Delta\delta_{\text{C}}$ | $\delta_{\text{C}}$ | $\Delta\delta_{\text{C}}$ | $\delta_{\text{C}}$ | $\Delta\delta_{\text{C}}$ |
| 1    | 158.2                 | 160.04              | 1.84                      | 160.20              | 2.00                      | 159.52              | 1.32                      | 159.51              | 1.31                      |
| 2    | 117.0                 | 115.66              | 1.34                      | 115.26              | 1.74                      | 115.29              | 1.71                      | 115.01              | 1.99                      |
| 3    | 140.8                 | 141.76              | 0.96                      | 142.21              | 1.41                      | 141.82              | 1.02                      | 141.80              | 1.00                      |
| 4    | 107.2                 | 104.63              | 2.57                      | 104.61              | 2.59                      | 104.40              | 2.80                      | 104.16              | 3.04                      |
| 4a   | 158.3                 | 158.02              | 0.28                      | 158.96              | 0.66                      | 158.59              | 0.29                      | 158.60              | 0.30                      |
| 5    | 81.8                  | 82.91               | 1.11                      | 82.36               | 0.56                      | 81.48               | 0.32                      | 82.18               | 0.38                      |
| 6    | 32.6                  | 37.57               | 4.97                      | 37.47               | 4.87                      | 37.32               | 4.72                      | 36.50               | 3.90                      |
| 7    | 36.7                  | 36.07               | 0.63                      | 36.04               | 0.66                      | 36.12               | 0.58                      | 35.76               | 0.94                      |
| 8    | 175.5                 | 174.89              | 0.61                      | 175.18              | 0.32                      | 175.46              | 0.04                      | 175.61              | 0.11                      |
| 9    | 195.3                 | 193.08              | 2.22                      | 192.77              | 2.53                      | 193.44              | 1.86                      | 193.55              | 1.75                      |
| 9a   | 107.1                 | 105.94              | 1.16                      | 105.83              | 1.27                      | 105.41              | 1.69                      | 105.24              | 1.86                      |
| 10   | 39.1                  | 40.17               | 1.07                      | 40.40               | 1.30                      | 41.96               | 2.86                      | 41.79               | 2.69                      |
| 10a  | 83.8                  | 88.12               | 4.32                      | 87.91               | 4.11                      | 86.47               | 2.67                      | 86.25               | 2.45                      |
| 11   | 14.7                  | 13.58               | 1.12                      | 13.47               | 1.23                      | 12.94               | 1.76                      | 12.29               | 2.41                      |
| 12   | 169.1                 | 172.56              | 3.46                      | 170.35              | 1.25                      | 170.95              | 1.85                      | 172.51              | 3.41                      |
| 13   | 53.6                  | 51.99               | 1.61                      | 52.09               | 1.51                      | 52.50               | 1.10                      | 52.22               | 1.38                      |
| 1'   | 158.2                 | 159.83              | 1.63                      | 160.04              | 1.84                      | 159.55              | 1.35                      | 159.68              | 1.48                      |
| 2'   | 115.5                 | 114.84              | 0.66                      | 115.60              | 0.10                      | 114.92              | 0.58                      | 115.31              | 0.19                      |
| 3'   | 140.5                 | 141.35              | 0.85                      | 141.60              | 1.10                      | 141.84              | 1.34                      | 141.68              | 1.18                      |
| 4'   | 107.2                 | 104.31              | 2.89                      | 104.88              | 2.32                      | 104.31              | 2.89                      | 104.64              | 2.56                      |
| 4a'  | 159.2                 | 158.90              | 0.30                      | 158.78              | 0.42                      | 158.75              | 0.45                      | 158.54              | 0.66                      |
| 5'   | 74.8                  | 75.09               | 0.29                      | 72.89               | 1.91                      | 78.48               | 3.68                      | 76.67               | 1.87                      |
| 6'   | 30.8                  | 31.37               | 0.57                      | 33.68               | 2.88                      | 31.58               | 0.78                      | 33.82               | 3.02                      |
| 7    | 39.8                  | 36.88               | 2.92                      | 35.80               | 4.00                      | 35.66               | 4.14                      | 38.01               | 1.79                      |
| 8'   | 173.6                 | 173.54              | 0.06                      | 173.55              | 0.05                      | 173.16              | 0.44                      | 172.93              | 0.67                      |
| 9'   | 197.2                 | 194.05              | 3.15                      | 195.43              | 1.77                      | 193.34              | 3.86                      | 194.82              | 2.38                      |
| 9a'  | 106.9                 | 105.94              | 0.96                      | 105.76              | 1.14                      | 105.68              | 1.22                      | 105.54              | 1.36                      |
| 10'  | 40.3                  | 41.14               | 0.84                      | 42.22               | 1.92                      | 44.92               | 4.62                      | 42.33               | 2.03                      |
| 10a' | 87.7                  | 89.52               | 1.82                      | 88.09               | 0.39                      | 82.69               | 5.01                      | 87.49               | 0.21                      |
| 11'  | 13.9                  | 12.36               | 1.54                      | 12.49               | 1.41                      | 12.53               | 1.37                      | 11.36               | 2.54                      |
| 12'  | 170.4                 | 171.74              | 1.34                      | 171.85              | 1.45                      | 175.93              | 5.53                      | 171.89              | 1.49                      |
| 13'  | 53.0                  | 51.95               | 1.05                      | 52.03               | 0.97                      | 52.79               | 0.21                      | 52.11               | 0.89                      |

**Table S2.** Experimental  $^1\text{H}$  NMR data of **1** and calculated  $^1\text{H}$  NMR data of **1a–1d** in DMSO

| no.  | <b>1</b>              | <b>1a</b>           |                           | <b>1b</b>           |                           | <b>1c</b>           |                           | <b>1d</b>           |                           |
|------|-----------------------|---------------------|---------------------------|---------------------|---------------------------|---------------------|---------------------------|---------------------|---------------------------|
|      | $\delta_{\text{exp}}$ | $\delta_{\text{H}}$ | $\Delta\delta_{\text{H}}$ | $\delta_{\text{H}}$ | $\Delta\delta_{\text{H}}$ | $\delta_{\text{H}}$ | $\Delta\delta_{\text{H}}$ | $\delta_{\text{H}}$ | $\Delta\delta_{\text{H}}$ |
| 3    | 7.49                  | 7.75                | -0.26                     | 7.68                | -0.19                     | 7.66                | -0.17                     | 7.72                | -0.23                     |
| 4    | 6.68                  | 6.51                | 0.17                      | 6.46                | 0.22                      | 6.43                | 0.25                      | 6.46                | 0.22                      |
| 5    | 4.94                  | 4.52                | 0.42                      | 4.67                | 0.27                      | 4.68                | 0.26                      | 4.75                | 0.19                      |
| 6    | 2.98                  | 2.99                | -0.01                     | 3.02                | -0.04                     | 2.96                | 0.02                      | 2.96                | 0.02                      |
| 7a   | 2.83                  | 2.66                | 0.17                      | 2.68                | 0.15                      | 2.34                | 0.49                      | 2.58                | 0.25                      |
| 7b   | 2.33                  | 2.30                | 0.03                      | 2.30                | 0.03                      | 2.57                | -0.24                     | 2.35                | -0.02                     |
| 10a  | 3.61                  | 3.13                | 0.48                      | 2.91                | 0.70                      | 3.65                | -0.04                     | 3.58                | 0.03                      |
| 10b  | 3.06                  | 3.26                | -0.20                     | 3.39                | -0.33                     | 2.76                | 0.30                      | 2.80                | 0.26                      |
| 11   | 1.18                  | 1.35                | -0.17                     | 1.39                | -0.21                     | 1.24                | -0.06                     | 1.27                | -0.09                     |
| 13   | 3.70                  | 3.48                | 0.22                      | 3.58                | 0.12                      | 3.58                | 0.12                      | 3.51                | 0.19                      |
| 3'   | 7.47                  | 7.72                | -0.25                     | 7.67                | -0.20                     | 7.64                | -0.17                     | 7.72                | -0.25                     |
| 4'   | 6.61                  | 6.52                | 0.09                      | 6.49                | 0.12                      | 6.41                | 0.20                      | 6.49                | 0.12                      |
| 5'   | 3.89                  | 3.96                | -0.07                     | 3.77                | 0.12                      | 4.27                | -0.38                     | 3.70                | 0.19                      |
| 6'   | 2.22                  | 2.44                | -0.22                     | 2.04                | 0.18                      | 2.58                | -0.36                     | 2.17                | 0.05                      |
| 7'a  | 2.41                  | 2.69                | -0.28                     | 2.89                | -0.48                     | 2.78                | -0.37                     | 2.63                | -0.22                     |
| 7'b  | 2.19                  | 2.35                | -0.16                     | 2.24                | -0.05                     | 2.39                | -0.20                     | 2.55                | -0.36                     |
| 10'a | 3.50                  | 3.03                | 0.47                      | 2.99                | 0.51                      | 3.22                | 0.28                      | 3.71                | -0.21                     |
| 10'b | 3.01                  | 3.35                | -0.34                     | 3.68                | -0.67                     | 3.14                | -0.13                     | 2.99                | 0.02                      |
| 11'  | 0.93                  | 1.12                | -0.19                     | 1.19                | -0.26                     | 0.85                | 0.08                      | 1.14                | -0.21                     |
| 13'  | 3.64                  | 3.55                | 0.09                      | 3.61                | 0.03                      | 3.50                | 0.14                      | 3.58                | 0.06                      |

**Table S3.** Statistical parameters of calculated  $^1\text{H}$  and  $^{13}\text{C}$  NMR data of **1a–1d** against experimental data of **1**

| compound  | type            | CMAD | CLAD | R <sup>2</sup> | RMSD   |
|-----------|-----------------|------|------|----------------|--------|
| <b>1a</b> | $^{13}\text{C}$ | 1.57 | 4.97 | 0.9988         | 2.0223 |
|           | $^1\text{H}$    | 0.21 | 0.48 | 0.9824         | 0.2648 |
| <b>1b</b> | $^{13}\text{C}$ | 1.62 | 4.87 | 0.9988         | 2.0348 |
|           | $^1\text{H}$    | 0.24 | 0.70 | 0.9729         | 0.3286 |
| <b>1c</b> | $^{13}\text{C}$ | 2.00 | 5.53 | 0.9980         | 2.6157 |
|           | $^1\text{H}$    | 0.21 | 0.59 | 0.9811         | 0.2748 |
| <b>1d</b> | $^{13}\text{C}$ | 1.66 | 3.90 | 0.9988         | 1.9940 |
|           | $^1\text{H}$    | 0.16 | 0.44 | 0.9897         | 0.2025 |

**Table S4.** Experimental  $^{13}\text{C}$  NMR data of **2** and calculated  $^{13}\text{C}$  NMR data of **2a–2d** in Chloroform

| no.  | <b>2</b>              | <b>2a</b>           |                           | <b>2b</b>           |                           | <b>2c</b>           |                           | <b>2d</b>           |                           |
|------|-----------------------|---------------------|---------------------------|---------------------|---------------------------|---------------------|---------------------------|---------------------|---------------------------|
|      | $\delta_{\text{exp}}$ | $\delta_{\text{C}}$ | $\Delta\delta_{\text{C}}$ | $\delta_{\text{C}}$ | $\Delta\delta_{\text{C}}$ | $\delta_{\text{C}}$ | $\Delta\delta_{\text{C}}$ | $\delta_{\text{C}}$ | $\Delta\delta_{\text{C}}$ |
| 1    | 159.3                 | 160.73              | 1.43                      | 160.81              | 1.51                      | 160.60              | 1.30                      | 160.51              | 1.21                      |
| 2    | 116.6                 | 116.30              | 0.30                      | 116.38              | 0.22                      | 115.94              | 0.66                      | 115.96              | 0.64                      |
| 3    | 141.7                 | 143.05              | 1.35                      | 143.09              | 1.39                      | 143.08              | 1.38                      | 142.84              | 1.14                      |
| 4    | 107.9                 | 105.26              | 2.64                      | 105.02              | 2.88                      | 104.81              | 3.09                      | 104.47              | 3.43                      |
| 4a   | 159.3                 | 158.79              | 0.51                      | 158.66              | 0.64                      | 159.56              | 0.26                      | 159.32              | 0.02                      |
| 5    | 82.7                  | 84.22               | 1.52                      | 83.59               | 0.89                      | 81.33               | 1.37                      | 81.75               | 0.95                      |
| 6    | 33.7                  | 37.45               | 3.75                      | 37.13               | 3.43                      | 37.32               | 3.62                      | 37.02               | 3.32                      |
| 7    | 36.8                  | 34.46               | 2.34                      | 34.60               | 2.20                      | 36.06               | 0.74                      | 35.98               | 0.82                      |
| 8    | 175.0                 | 173.95              | 1.05                      | 174.03              | 0.97                      | 174.37              | 0.63                      | 174.25              | 0.75                      |
| 9    | 194.2                 | 192.85              | 1.35                      | 192.71              | 1.49                      | 193.19              | 1.01                      | 193.10              | 1.10                      |
| 9a   | 107.7                 | 106.25              | 1.45                      | 106.11              | 1.59                      | 105.57              | 2.13                      | 105.44              | 2.26                      |
| 10   | 40.0                  | 44.24               | 4.24                      | 43.90               | 3.90                      | 41.83               | 1.83                      | 41.91               | 1.91                      |
| 10a  | 84.7                  | 83.91               | 0.79                      | 83.71               | 0.99                      | 86.56               | 1.86                      | 86.51               | 1.81                      |
| 11   | 15.0                  | 12.54               | 2.46                      | 12.53               | 2.47                      | 13.07               | 1.93                      | 12.84               | 2.16                      |
| 12   | 169.1                 | 171.83              | 2.73                      | 171.92              | 2.82                      | 170.78              | 1.68                      | 171.76              | 2.66                      |
| 13   | 53.7                  | 52.86               | 0.84                      | 52.71               | 0.99                      | 52.32               | 1.38                      | 52.29               | 1.41                      |
| 1'   | 159.6                 | 160.71              | 1.11                      | 160.60              | 1.00                      | 160.85              | 1.25                      | 160.59              | 0.99                      |
| 2'   | 117.6                 | 117.58              | 0.02                      | 117.14              | 0.46                      | 117.67              | 0.07                      | 117.25              | 0.35                      |
| 3'   | 151.5                 | 152.97              | 1.47                      | 152.96              | 1.46                      | 152.97              | 1.47                      | 152.71              | 1.21                      |
| 4'   | 109.1                 | 106.69              | 2.41                      | 106.67              | 2.43                      | 106.58              | 2.52                      | 106.37              | 2.73                      |
| 4a'  | 158.9                 | 157.51              | 1.39                      | 158.45              | 0.45                      | 157.69              | 1.21                      | 158.24              | 0.66                      |
| 5'   | 81.1                  | 81.79               | 0.69                      | 78.99               | 2.11                      | 82.03               | 0.93                      | 79.43               | 1.67                      |
| 6'   | 22.2                  | 22.21               | 0.01                      | 23.64               | 1.44                      | 22.77               | 0.57                      | 23.92               | 1.72                      |
| 7    | 27.8                  | 27.32               | 0.48                      | 28.69               | 0.89                      | 27.39               | 0.41                      | 28.82               | 1.02                      |
| 8'   | 175.7                 | 175.13              | 0.57                      | 175.24              | 0.46                      | 174.83              | 0.87                      | 175.16              | 0.54                      |
| 9'   | 193.2                 | 192.03              | 1.17                      | 192.34              | 0.86                      | 191.94              | 1.26                      | 192.21              | 0.99                      |
| 9a'  | 105.8                 | 104.23              | 1.57                      | 103.89              | 1.91                      | 104.33              | 1.47                      | 103.83              | 1.97                      |
| 10'  | 39.6                  | 42.72               | 3.12                      | 40.67               | 1.07                      | 42.87               | 3.27                      | 40.73               | 1.13                      |
| 10a' | 84.2                  | 82.71               | 1.49                      | 87.01               | 2.81                      | 83.16               | 1.04                      | 87.15               | 2.95                      |
| 11'  | 21.5                  | 21.48               | 0.02                      | 21.48               | 0.02                      | 21.58               | 0.08                      | 21.58               | 0.08                      |
| 12'  | 169.1                 | 171.62              | 2.52                      | 171.08              | 1.98                      | 172.33              | 3.23                      | 171.77              | 2.67                      |
| 13'  | 53.9                  | 52.81               | 1.09                      | 52.44               | 1.46                      | 52.83               | 1.07                      | 52.49               | 1.41                      |



**Table S5.** Experimental  $^1\text{H}$  NMR data of **2** and calculated  $^1\text{H}$  NMR data of **2a–2d** in Chloroform

| no.  | <b>2</b>              | <b>2a</b>           |                           | <b>2b</b>           |                           | <b>2c</b>           |                           | <b>2d</b>           |                           |
|------|-----------------------|---------------------|---------------------------|---------------------|---------------------------|---------------------|---------------------------|---------------------|---------------------------|
|      | $\delta_{\text{exp}}$ | $\delta_{\text{H}}$ | $\Delta\delta_{\text{H}}$ | $\delta_{\text{H}}$ | $\Delta\delta_{\text{H}}$ | $\delta_{\text{H}}$ | $\Delta\delta_{\text{H}}$ | $\delta_{\text{H}}$ | $\Delta\delta_{\text{H}}$ |
| 3    | 7.37                  | 7.42                | -0.05                     | 7.43                | -0.06                     | 7.43                | -0.06                     | 7.47                | -0.10                     |
| 4    | 6.67                  | 6.63                | 0.04                      | 6.62                | 0.05                      | 6.60                | 0.07                      | 6.61                | 0.06                      |
| 5    | 4.80                  | 4.77                | 0.03                      | 4.77                | 0.03                      | 4.80                | 0.00                      | 4.84                | -0.04                     |
| 6    | 3.00                  | 3.06                | -0.06                     | 3.04                | -0.04                     | 3.03                | -0.03                     | 2.99                | 0.01                      |
| 7a   | 2.69                  | 2.38                | 0.31                      | 2.39                | 0.30                      | 2.73                | -0.04                     | 2.58                | 0.11                      |
| 7b   | 2.50                  | 2.08                | 0.42                      | 2.06                | 0.44                      | 2.40                | 0.10                      | 2.46                | 0.04                      |
| 10a  | 3.27                  | 3.36                | -0.09                     | 3.46                | -0.19                     | 3.44                | -0.17                     | 3.32                | -0.05                     |
| 10b  | 3.20                  | 3.31                | -0.11                     | 3.16                | 0.04                      | 3.22                | -0.02                     | 3.26                | -0.06                     |
| 11   | 1.36                  | 1.66                | -0.30                     | 1.59                | -0.23                     | 1.35                | 0.01                      | 1.30                | 0.06                      |
| 13   | 3.77                  | 3.68                | 0.09                      | 3.68                | 0.09                      | 3.73                | 0.04                      | 3.66                | 0.11                      |
| 4'   | 6.57                  | 6.50                | 0.07                      | 6.52                | 0.05                      | 6.51                | 0.06                      | 6.53                | 0.04                      |
| 5'   | 4.88                  | 4.80                | 0.08                      | 4.69                | 0.19                      | 4.78                | 0.10                      | 4.68                | 0.20                      |
| 6'   | 2.45                  | 2.79                | -0.34                     | 2.46                | -0.01                     | 2.69                | -0.24                     | 2.41                | 0.04                      |
| 7'a  | 2.72                  | 2.41                | 0.31                      | 2.86                | -0.14                     | 2.32                | 0.40                      | 2.62                | 0.10                      |
| 7'b  | 2.60                  | 2.40                | 0.20                      | 2.43                | 0.17                      | 2.33                | 0.27                      | 2.58                | 0.02                      |
| 10'a | 3.11                  | 3.37                | -0.26                     | 3.60                | -0.49                     | 3.33                | -0.22                     | 3.37                | -0.26                     |
| 10'b | 2.97                  | 3.24                | -0.27                     | 3.06                | -0.09                     | 3.21                | -0.24                     | 3.21                | -0.24                     |
| 11'  | 2.12                  | 2.32                | -0.20                     | 2.32                | -0.20                     | 2.31                | -0.19                     | 2.29                | -0.17                     |
| 13'  | 3.79                  | 3.67                | 0.12                      | 3.70                | 0.09                      | 3.63                | 0.16                      | 3.65                | 0.14                      |

**Table S6.** Statistical parameters of calculated  $^1\text{H}$  and  $^{13}\text{C}$  NMR data of **2a–2d** against experimental data of **2**

| compound  | type            | CMAD | CLAD | R <sup>2</sup> | RMSD   |
|-----------|-----------------|------|------|----------------|--------|
| <b>2a</b> | $^{13}\text{C}$ | 1.50 | 4.24 | 0.9990         | 1.8831 |
|           | $^1\text{H}$    | 0.18 | 0.42 | 0.9825         | 0.2249 |
| <b>2b</b> | $^{13}\text{C}$ | 1.54 | 3.90 | 0.9990         | 1.8587 |
|           | $^1\text{H}$    | 0.15 | 0.49 | 0.9843         | 0.2127 |
| <b>2c</b> | $^{13}\text{C}$ | 1.42 | 3.62 | 0.9991         | 1.7427 |
|           | $^1\text{H}$    | 0.13 | 0.40 | 0.9893         | 0.1756 |
| <b>2d</b> | $^{13}\text{C}$ | 1.49 | 3.43 | 0.9991         | 1.7931 |
|           | $^1\text{H}$    | 0.10 | 0.26 | 0.9942         | 0.1289 |

| Functional       |       | Solvent? |          | Basis Set   |          | Type of Data    |          |
|------------------|-------|----------|----------|-------------|----------|-----------------|----------|
| mPW1PW91         |       | PCM      |          | 6-311G(d,p) |          | Unscaled Shifts |          |
|                  |       | Isomer 1 | Isomer 2 | Isomer 3    | Isomer 4 | Isomer 5        | Isomer 6 |
| sDP4+ (H data)   | 0.00% | 0.15%    | 1.91%    | 97.93%      | -        | -               | -        |
| sDP4+ (C data)   | 7.74% | 4.35%    | 72.56%   | 15.35%      | -        | -               | -        |
| sDP4+ (all data) | 0.00% | 0.04%    | 8.45%    | 91.51%      | -        | -               | -        |
| uDP4+ (H data)   | 0.01% | 0.53%    | 0.95%    | 98.51%      | -        | -               | -        |
| uDP4+ (C data)   | 8.32% | 22.56%   | 44.87%   | 24.25%      | -        | -               | -        |
| uDP4+ (all data) | 0.00% | 0.49%    | 1.74%    | 97.76%      | -        | -               | -        |
| DP4+ (H data)    | 0.00% | 0.00%    | 0.02%    | 99.98%      | -        | -               | -        |
| DP4+ (C data)    | 1.70% | 2.59%    | 85.89%   | 9.82%       | -        | -               | -        |
| DP4+ (all data)  | 0.00% | 0.00%    | 0.16%    | 99.84%      | -        | -               | -        |

  

| Functional |      | Solvent?   |            | Basis Set   |            | Type of Data    |          |
|------------|------|------------|------------|-------------|------------|-----------------|----------|
| mPW1PW91   |      | PCM        |            | 6-311G(d,p) |            | Unscaled Shifts |          |
|            |      | DP4+       | 0.00%      | 0.00%       | 0.16%      | 99.84%          | -        |
| Nuclei     | sp2? | xperimenta | Isomer 1   | Isomer 2    | Isomer 3   | Isomer 4        | Isomer 5 |
| C          | x    | 159.3      | 168.134483 | 168.201346  | 167.944218 | 167.945856      |          |
| C          | x    | 116.6      | 121.85752  | 121.946989  | 121.422941 | 121.513504      |          |
| C          | x    | 141.7      | 149.721077 | 149.751762  | 149.695779 | 149.525196      |          |
| C          | x    | 107.9      | 110.36324  | 110.124516  | 109.830627 | 109.543781      |          |
| C          | x    | 159.3      | 166.111782 | 165.962627  | 166.863597 | 166.703866      |          |
| C          |      | 82.7       | 88.4489688 | 87.8114782  | 85.3770515 | 85.8649864      |          |
| C          |      | 33.7       | 39.7403222 | 39.4470204  | 39.5320246 | 39.2427195      |          |
| C          |      | 36.8       | 36.623134  | 36.814117   | 38.2221212 | 38.162219       |          |
| C          |      | 175        | 181.899454 | 181.967065  | 182.283425 | 182.27004       |          |
| C          | x    | 194.2      | 201.580729 | 201.410173  | 201.893302 | 201.915454      |          |
| C          | x    | 107.7      | 111.392556 | 111.259537  | 110.627093 | 110.553059      |          |
| C          |      | 40         | 46.8070425 | 46.4923084  | 44.2329797 | 44.334952       |          |
| C          |      | 84.7       | 88.1215101 | 87.9356251  | 90.8168853 | 90.8232218      |          |
| C          |      | 15         | 13.7978538 | 13.8366773  | 14.2765372 | 14.0400883      |          |
| C          | x    | 169.1      | 179.697764 | 179.771036  | 178.544879 | 179.669414      |          |
| C          |      | 53.7       | 55.7832201 | 55.6668671  | 55.1581784 | 55.1559551      |          |
| C          | x    | 159.6      | 168.111336 | 167.981439  | 168.199929 | 168.026466      |          |
| C          | x    | 117.6      | 123.196072 | 122.737399  | 123.231001 | 122.85693       |          |
| C          | x    | 151.5      | 160.048683 | 160.029278  | 160.000436 | 159.820309      |          |
| C          | x    | 109.1      | 111.846863 | 111.839664  | 111.675012 | 111.522326      |          |
| C          | x    | 158.9      | 164.782673 | 165.750711  | 164.911864 | 165.576262      |          |
| C          |      | 81.1       | 85.9133698 | 83.0259565  | 86.1033172 | 83.4423663      |          |
| C          |      | 22.2       | 23.8697875 | 25.4015453  | 24.3787783 | 25.5864798      |          |
| C          |      | 27.8       | 29.1880727 | 30.6597902  | 29.1896896 | 30.6908994      |          |
| C          | x    | 175.7      | 183.134828 | 183.225899  | 182.76287  | 183.211965      |          |
| C          | x    | 193.2      | 200.728317 | 201.03329   | 200.586833 | 200.989444      |          |
| C          | x    | 105.8      | 109.290106 | 108.94805   | 109.332685 | 108.875282      |          |
| C          |      | 39.6       | 45.2280874 | 43.1263875  | 45.3089061 | 43.1110254      |          |
| C          |      | 84.2       | 86.8746141 | 91.368581   | 87.2752306 | 91.4864682      |          |
| C          |      | 21.5       | 23.1035054 | 23.156237   | 23.1326239 | 23.1523536      |          |
| C          | x    | 169.1      | 179.470753 | 178.895356  | 180.162376 | 179.681732      |          |
| C          |      | 53.9       | 55.7378825 | 55.3829434  | 55.6826553 | 55.3646858      |          |
| H          | x    | 7.37       | 7.66559338 | 7.673938    | 7.67012904 | 7.67161066      |          |
| H          | x    | 6.67       | 6.82758094 | 6.80985815  | 6.79175568 | 6.77182264      |          |
| H          |      | 4.8        | 4.83031529 | 4.83334748  | 4.87043226 | 4.9139434       |          |
| H          |      | 3          | 2.99115475 | 2.99430985  | 2.99519644 | 2.98108887      |          |
| H          |      | 2.69       | 2.25905093 | 2.29177772  | 2.67641378 | 2.5511557       |          |
| H          |      | 2.5        | 1.94251503 | 1.94566288  | 2.32296762 | 2.42296383      |          |
| H          |      | 3.27       | 3.31245677 | 3.44241887  | 3.42462998 | 3.32950501      |          |
| H          |      | 3.2        | 3.26364159 | 3.11439695  | 3.19282272 | 3.25836584      |          |
| H          |      | 1.36       | 1.48620948 | 1.43772799  | 1.20502659 | 1.21363429      |          |
| H          |      | 3.77       | 3.65728256 | 3.67556192  | 3.73226445 | 3.67846951      |          |
| H          | x    | 6.57       | 6.68384985 | 6.69709089  | 6.686255   | 6.6831775       |          |
| H          |      | 4.88       | 4.85979556 | 4.75336863  | 4.8525023  | 4.74606301      |          |
| H          |      | 2.45       | 2.70222147 | 2.36681201  | 2.6299884  | 2.36966076      |          |
| H          |      | 2.72       | 2.29626099 | 2.7997859   | 2.23597372 | 2.58861839      |          |
| H          |      | 2.6        | 2.27988156 | 2.34404338  | 2.24938774 | 2.55588536      |          |
| H          |      | 3.11       | 3.32152236 | 3.58192477  | 3.311886   | 3.38138817      |          |
| H          |      | 2.97       | 3.19061447 | 3.01191027  | 3.18243914 | 3.2115873       |          |
| H          |      | 2.12       | 2.20375049 | 2.22187009  | 2.22753686 | 2.24581217      |          |
| H          |      | 3.79       | 3.64194819 | 3.6945803   | 3.62864256 | 3.67100418      |          |

**Figure S8.** Detailed DP4+ probability analysis for **2**. Isomer 1 is (5*S*,6*R*,10*aR*,5'*S*,10*aR*')-**2a**, isomer 2 is (5*S*,6*R*,10*aR*,5'*R*,10*aR*')-**2b**, isomer 3 is (5*R*,6*S*,10*aR*,5'*S*,10*aR*')-**2c**, isomer 4 is (5*R*,6*S*,10*aR*,5'*R*,10*aR*')-**2d**

**Table S7.** Experimental  $^{13}\text{C}$  NMR data of **3** and calculated  $^{13}\text{C}$  NMR data of **3a** and **3b** in DMSO

| no.  | <b>3</b>              | <b>3a</b>           |                           | <b>3b</b>           |                           |
|------|-----------------------|---------------------|---------------------------|---------------------|---------------------------|
|      | $\delta_{\text{exp}}$ | $\delta_{\text{C}}$ | $\Delta\delta_{\text{C}}$ | $\delta_{\text{C}}$ | $\Delta\delta_{\text{C}}$ |
| 1    | 160.2                 | 160.79              | 0.59                      | 161.30              | 1.10                      |
| 2    | 109.5                 | 106.79              | 2.71                      | 107.21              | 2.29                      |
| 3    | 141.0                 | 140.46              | 0.54                      | 143.74              | 2.74                      |
| 4    | 114.0                 | 113.46              | 0.54                      | 113.56              | 0.44                      |
| 4a   | 155.4                 | 157.13              | 1.73                      | 156.45              | 1.05                      |
| 5    | 81.6                  | 81.28               | 0.32                      | 81.51               | 0.09                      |
| 6    | 32.8                  | 36.35               | 3.55                      | 36.60               | 3.80                      |
| 7    | 35.8                  | 35.39               | 0.41                      | 34.78               | 1.02                      |
| 8    | 174.9                 | 175.51              | 0.61                      | 174.31              | 0.59                      |
| 9    | 194.6                 | 193.28              | 1.32                      | 191.99              | 2.61                      |
| 9a   | 107.3                 | 105.58              | 1.72                      | 105.14              | 2.16                      |
| 10   | 39.2                  | 41.95               | 2.75                      | 40.21               | 1.01                      |
| 10a  | 85.3                  | 85.12               | 0.18                      | 87.61               | 2.31                      |
| 11   | 14.3                  | 12.59               | 1.71                      | 12.31               | 1.99                      |
| 12   | 169.1                 | 170.07              | 0.97                      | 170.05              | 0.95                      |
| 13   | 53.6                  | 51.95               | 1.65                      | 51.63               | 1.97                      |
| 1'   | 160.2                 | 160.88              | 0.68                      | 161.19              | 0.99                      |
| 2'   | 109.5                 | 106.96              | 2.54                      | 108.14              | 1.36                      |
| 3'   | 141.0                 | 140.72              | 0.28                      | 143.23              | 2.23                      |
| 4'   | 114.0                 | 113.47              | 0.53                      | 113.34              | 0.66                      |
| 4a'  | 155.4                 | 157.12              | 1.72                      | 155.91              | 0.51                      |
| 5'   | 81.6                  | 82.04               | 0.44                      | 84.05               | 2.45                      |
| 6'   | 32.8                  | 35.95               | 3.15                      | 35.76               | 2.96                      |
| 7    | 35.8                  | 35.34               | 0.46                      | 33.87               | 1.93                      |
| 8'   | 174.9                 | 175.42              | 0.52                      | 174.18              | 0.72                      |
| 9'   | 194.6                 | 193.28              | 1.32                      | 191.94              | 2.66                      |
| 9a'  | 107.3                 | 105.62              | 1.68                      | 105.23              | 2.07                      |
| 10'  | 39.2                  | 41.98               | 2.78                      | 43.02               | 3.82                      |
| 10a' | 85.3                  | 85.11               | 0.19                      | 82.87               | 2.43                      |
| 11'  | 14.3                  | 12.52               | 1.78                      | 12.63               | 1.67                      |
| 12'  | 169.1                 | 171.13              | 2.03                      | 171.67              | 2.57                      |
| 13'  | 53.6                  | 51.93               | 1.67                      | 51.79               | 1.81                      |

**Table S8.** Experimental  $^1\text{H}$  NMR data of **3** and calculated  $^1\text{H}$  NMR data of **3a** and **3b** in DMSO

| no.  | <b>3</b>              | <b>3a</b>           |                           | <b>3b</b>           |                           |
|------|-----------------------|---------------------|---------------------------|---------------------|---------------------------|
|      | $\delta_{\text{exp}}$ | $\delta_{\text{H}}$ | $\Delta\delta_{\text{H}}$ | $\delta_{\text{H}}$ | $\Delta\delta_{\text{H}}$ |
| 2    | 6.49                  | 6.60                | 0.11                      | 6.48                | 0.01                      |
| 3    | 7.75                  | 7.45                | 0.30                      | 7.95                | 0.20                      |
| 5    | 4.85                  | 4.83                | 0.02                      | 4.67                | 0.18                      |
| 6    | 2.88                  | 3.00                | 0.12                      | 2.98                | 0.10                      |
| 7a   | 2.45                  | 2.13                | 0.32                      | 2.04                | 0.41                      |
| 7b   | 1.72                  | 1.47                | 0.25                      | 1.96                | 0.24                      |
| 10a  | 3.56                  | 4.18                | 0.62                      | 3.43                | 0.13                      |
| 10b  | 3.17                  | 2.90                | 0.27                      | 3.06                | 0.11                      |
| 11   | 1.00                  | 1.25                | 0.25                      | 1.37                | 0.37                      |
| 13   | 3.75                  | 3.78                | 0.03                      | 3.72                | 0.03                      |
| 2'   | 6.49                  | 6.61                | 0.12                      | 6.43                | 0.06                      |
| 3'   | 7.75                  | 7.46                | 0.29                      | 7.94                | 0.19                      |
| 5'   | 4.85                  | 4.86                | 0.01                      | 4.65                | 0.20                      |
| 6'   | 2.88                  | 2.98                | 0.10                      | 2.88                | 0.00                      |
| 7'a  | 2.45                  | 2.15                | 0.30                      | 2.32                | 0.13                      |
| 7'b  | 1.72                  | 1.52                | 0.20                      | 2.01                | 0.29                      |
| 10'a | 3.56                  | 4.15                | 0.59                      | 3.33                | 0.23                      |
| 10'b | 3.17                  | 2.89                | 0.28                      | 3.20                | 0.03                      |
| 11'  | 1.00                  | 1.27                | 0.27                      | 1.13                | 0.13                      |
| 13'  | 3.75                  | 3.73                | 0.02                      | 3.69                | 0.06                      |

**Table S9.** Statistical parameters of calculated  $^1\text{H}$  and  $^{13}\text{C}$  NMR data of **3a** and **3b** against experimental data of **3**

| compound  | type            | CMAD | CLAD | $R^2$  | RMSD   |
|-----------|-----------------|------|------|--------|--------|
| <b>3a</b> | $^{13}\text{C}$ | 1.35 | 3.55 | 0.9991 | 1.7002 |
|           | $^1\text{H}$    | 0.22 | 0.62 | 0.9803 | 0.2927 |
| <b>3b</b> | $^{13}\text{C}$ | 1.78 | 3.82 | 0.9987 | 2.0795 |
|           | $^1\text{H}$    | 0.16 | 0.41 | 0.9907 | 0.2011 |

**Table S10.**  $^{13}\text{C}$  NMR data of **5** and **6**

| no.  | <b>5</b><br>( $\text{CDCl}_3$ ) | <b>5</b><br>( $\text{DMSO-}d_6$ ) | <b>6</b><br>( $\text{CDCl}_3$ ) | <b>6</b><br>( $\text{DMSO-}d_6$ ) |
|------|---------------------------------|-----------------------------------|---------------------------------|-----------------------------------|
| 1    | 159.3                           | 158.4                             | 156.2                           | 156.1                             |
| 2    | 117.7                           | 116.9                             | 110.4                           | 109.2                             |
| 3    | 141.4                           | 140.7                             | 141.4                           | 140.9                             |
| 4    | 107.5                           | 107.1                             | 115.4                           | 114.8                             |
| 4a   | 158.6                           | 158.2                             | 161.9                           | 160.4                             |
| 5    | 82.8                            | 81.8                              | 82.4                            | 81.7                              |
| 6    | 33.7                            | 32.6                              | 34.0                            | 32.9                              |
| 7    | 36.8                            | 36.8                              | 37.1                            | 35.2                              |
| 8    | 175.0                           | 175.5                             | 174.6                           | 174.9                             |
| 9    | 194.2                           | 195.2                             | 194.2                           | 194.9                             |
| 9a   | 107.7                           | 107.2                             | 107.9                           | 107.5                             |
| 10   | 39.9                            | 40.0                              | 35.3                            | 32.9                              |
| 10a  | 84.6                            | 83.8                              | 85.9                            | 85.4                              |
| 11   | 15.0                            | 14.7                              | 14.7                            | 14.1                              |
| 12   | 169.2                           | 169.1                             | 169.0                           | 168.9                             |
| 13   | 53.9                            | 53.6                              | 53.8                            | 53.5                              |
| 1'   | 159.3                           | 158.4                             | 158.5                           | 158.0                             |
| 2'   | 117.7                           | 116.9                             | 117.8                           | 116.6                             |
| 3'   | 141.4                           | 140.7                             | 141.2                           | 140.6                             |
| 4'   | 107.5                           | 107.1                             | 107.9                           | 107.4                             |
| 4a'  | 158.6                           | 158.2                             | 159.1                           | 158.2                             |
| 5'   | 82.8                            | 81.8                              | 83.0                            | 81.9                              |
| 6'   | 33.7                            | 32.6                              | 33.4                            | 32.5                              |
| 7'   | 36.8                            | 36.8                              | 39.7                            | 36.9                              |
| 8'   | 175.0                           | 175.5                             | 174.9                           | 175.5                             |
| 9'   | 194.2                           | 195.2                             | 194.7                           | 195.3                             |
| 9a'  | 107.7                           | 107.2                             | 107.5                           | 107.0                             |
| 10'  | 39.9                            | 40.0                              | 40.1                            | 39.2                              |
| 10a' | 84.6                            | 83.8                              | 84.5                            | 83.9                              |
| 11'  | 15.0                            | 14.7                              | 15.0                            | 14.6                              |
| 12'  | 169.2                           | 169.1                             | 168.8                           | 169.3                             |
| 13'  | 53.9                            | 53.6                              | 53.8                            | 53.5                              |

**Table S11.**  $^1\text{H}$  NMR data of **5** and **6**

| no.   | <b>5</b><br>( $\text{CDCl}_3$ ) | <b>5</b><br>( $\text{DMSO}-d_6$ ) | <b>6</b><br>( $\text{CDCl}_3$ ) | <b>6</b><br>( $\text{DMSO}-d_6$ ) |
|-------|---------------------------------|-----------------------------------|---------------------------------|-----------------------------------|
| 2     |                                 |                                   | 6.63, d (3.6)                   | 6.61, d (3.0)                     |
| 3     | 7.53, d (8.4)                   | 7.50, d (8.4)                     | 7.46, d (8.4)                   | 7.49, d (9.0)                     |
| 4     | 6.63, d (8.4)                   | 6.69, d (8.4)                     |                                 |                                   |
| 5     | 4.81, d (6.6)                   | 4.94, d (6.6)                     | 4.65, d (7.2)                   | 4.84, d (7.2)                     |
| 6     | 2.99, m                         | 2.98, m                           | 2.87, m                         | 2.86, m                           |
| 7     | 2.49, dd (17.4, 8.4)            | 2.33, dd (16.8, 6.0)              | 1.94, dd (17.4, 11.4)           | 1.75, dd (17.4, 10.2)             |
|       | 2.71, dd (17.4, 8.4)            | 2.83, dd (17.4, 8.4)              | 2.43, dd (17.4, 7.2)            | 2.40, dd (17.4, 8.4)              |
| 10    | 3.24, m                         | 3.06, d (17.4)                    | 3.34, d (17.4)                  | 3.58, d (18.0)                    |
|       |                                 |                                   | 3.16, d (17.4)                  | 3.04, d (17.4)                    |
| 11    | 1.34, d (7.2)                   | 1.18, d (7.2)                     | 1.23, d (7.2)                   | 1.05, d (7.2)                     |
| 13    | 3.77, s                         | 3.70, s                           | 3.80, s                         | 3.69, s                           |
| 3'    | 7.53, d (8.4)                   | 7.50, d (8.4)                     | 7.58, d (8.4)                   | 7.60, d (9.0)                     |
| 4'    | 6.63, d (8.4)                   | 6.69, d (8.4)                     | 6.62, d (3.6)                   | 6.59, d (3)                       |
| 5'    | 4.81, d (6.6)                   | 4.94, d (6.6)                     | 4.86, d (6.6)                   | 4.95, d (6.6)                     |
| 6'    | 2.99, m                         | 2.98, m                           | 2.95, m                         | 2.97, m                           |
| 7'    | 2.49, dd (17.4, 8.4)            | 2.33, dd (16.8, 6.0)              | 2.28, dd (17.4, 8.4)            | 2.32, dd (16.8, 5.4)              |
|       | 2.71, dd (17.4, 8.4)            | 2.83, dd (17.4, 8.4)              | 2.73, dd (17.4, 8.4)            | 2.86, dd (17.4, 8.4)              |
| 10'   | 3.24, m                         | 3.06, d (17.4)                    | 3.27, d (17.4)                  | 3.57, d (17.4)                    |
|       |                                 |                                   | 3.20, d (17.4)                  | 3.08, d (17.4)                    |
| 11'   | 1.34, d (7.2)                   | 1.18, d (7.2)                     | 1.30, d (7.2)                   | 1.16, d (7.2)                     |
| 13'   | 3.77, s                         | 3.70, s                           | 3.74, s                         | 3.68, s                           |
| 1-OH  | 11.92, s                        | 11.83, s                          | 11.58, s                        | 11.55, s                          |
| 1'-OH | 11.92, s                        | 11.83, s                          | 11.83, s                        | 11.82, s                          |

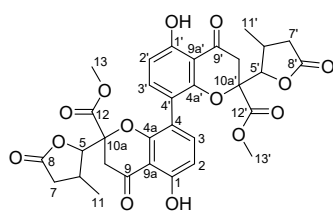paecilin A (**4**)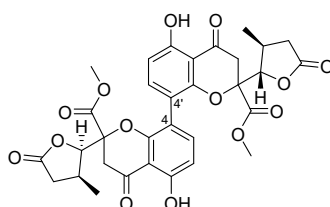paecilin C (**3A**)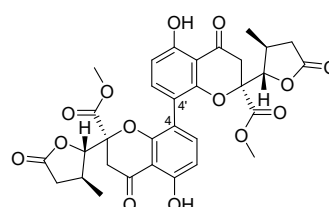dimethyl (2S,2'S)-5,5'-dihydroxy-2,2'-bis[(2S,3S)-3-methyl-5-oxotetrahydrofuran-2-yl]4,4'-dioxo-[8,8'-bichroman]-2,2'-dicarboxylate (**3B**)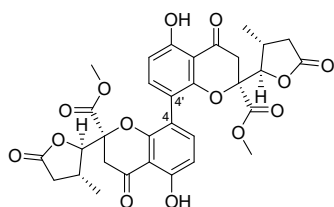dimethyl (2S,2'S)-5,5'-dihydroxy-2,2'-bis[(2R,3R)-3-methyl-5-oxotetrahydrofuran-2-yl]-4,4'-dioxo-[8,8'-bichromane]-2,2'-dicarboxylate (**3C**)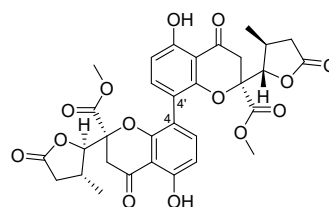dimethyl (2S,2'S)-5,5'-dihydroxy-2-[(2S,3S)-3-methyl-5-oxotetrahydrofuran-2-yl]-2'-[(2R,3R)-3-methyl-5-oxotetrahydrofuran-2-yl]-4,4'-dioxo-[8,8'-bichromane]-2,2'-dicarboxylate (**3D**)**Figure S9.** Structures of chromanone dimers with 4–4' linkage

**Table S12.** <sup>1</sup>H NMR data of chromanone dimers with 4–4' linkage

| no.   | <b>4</b>              | <b>3A</b>            | <b>3B</b>            | <b>3C</b>            | <b>3D</b>            |
|-------|-----------------------|----------------------|----------------------|----------------------|----------------------|
| 2     | 6.63, d (8.5)         | 6.64, d (8.0)        | 6.60, d (8.7)        | 6.65, d (8.8)        | 6.60, d (8.7)        |
| 3     | 7.46, d (9.0)         | 7.52, d (8.5)        | 7.47-7.82, m         | 7.93, d (8.8)        | 7.77, d (8.7)        |
| 5     | 4.86, d (6.5)         | 4.82, d (6.5)        | 4.26, d (3.0)        | 4.34, d (3.6)        | 4.32, d (3.1)        |
| 6     | 2.95, m               | 3.00, m              | 2.39-2.57, m         | 2.68-2.75, m         | 2.77, m              |
| 7     | 2.74, dd (17.0, 7.0)  | 2.73, dd (17.0, 8.0) | 2.06, dd (18.0, 9.0) | 2.45, dd (18.0, 9.3) | 2.33, dd (17.9, 9.3) |
|       | 2.43, dd (17.0, 7.0)  | 2.52, dd (17.5, 8.5) | 1.82, dd (18.0, 3.6) | 2.03, dd (18.0, 4.3) | 1.94, dd (17.9, 3.7) |
| 10    | 3.34, d (17.5)        | 3.29, d (17.5)       | 3.59, d (17.4)       | 3.20, d (17.0)       | 3.19, d (17.1)       |
|       | 3.21, d (17.0)        |                      | 3.03, d (17.4)       | 3.01, d (17.0)       | 3.13, d (17.1)       |
| 11    | 1.30, d (7.0)         | 1.36, d (7.0)        | 1.05, d (6.9)        | 1.15, d (7.1)        | 1.11, d (7.1)        |
| 13    | 3.78, s               | 3.79, s              | 3.76, s              | 3.80, s              | 3.76, s              |
| 2'    | 6.62, d (8.5)         | 6.63, d (8.0)        | 6.60, d (8.7)        | 6.65, d (8.8)        | 6.63, d (8.7)        |
| 3'    | 7.57, d (8.5)         | 7.54, d (8.5)        | 7.47-7.82, m         | 7.93, d (8.8)        | 7.73, d (8.7)        |
| 5'    | 4.65, d (7.5)         | 4.10, s              | 4.26, d (3.0)        | 4.34, d (3.6)        | 4.27, d (2.7)        |
| 6'    | 2.87, m               | 2.39, m              | 2.39-2.57, m         | 2.68-2.75, m         | 2.49, m              |
| 7'    | 2.30, dd (17.0, 8.5)  | 2.67, dd (17.0, 8.0) | 2.06, dd (18.0, 9.0) | 2.45, dd (18.0, 9.3) | 2.08, dd (18.1, 9.3) |
|       | 1.96, dd (17.0, 11.0) | 2.46, m              | 1.82, dd (18.0, 3.6) | 2.03, dd (18.0, 4.3) | 1.85, dd (18.1, 3.4) |
| 10'   | 3.27, d (17.0)        | 3.22, d, (17.5)      | 3.59, d (17.4)       | 3.20, d (17.0)       | 3.43, d (17.3)       |
|       | 3.16, d (17.0)        |                      | 3.03, d (17.4)       | 3.01, d (17.0)       | 3.06, d (17.3)       |
| 11'   | 1.23, d (7.0)         | 1.11, d (6.5)        | 1.05, d (6.9)        | 1.15, d (7.1)        | 1.09, d (7.2)        |
| 13'   | 3.74, s               | 3.77, s              | 3.76, s              | 3.80, s              | 3.79, s              |
| 1-OH  | 11.57, s              | 11.92, s             | 11.61, s             |                      | 11.56, s             |
| 1'-OH | 11.82, s              | 12.03, s             | 11.61                |                      | 11.64, s             |

**Table S13.**  $^{13}\text{C}$  NMR data of chromanone dimers with 4–4' linkage

| no.  | <b>4</b> | <b>3A</b> | <b>3B</b> | <b>3C</b> | <b>3D</b> |
|------|----------|-----------|-----------|-----------|-----------|
| 1    | 161.8    | 159.2     | 161.6     | 161.7     | 161.9     |
| 2    | 110.3    | 107.4     | 109.9     | 111.1     | 111.3     |
| 3    | 141.3    | 140.9     | 140.8     | 142.0     | 141.3     |
| 4    | 115.3    | 117.4     | 115.0     | 114.0     | 114.5     |
| 4a   | 156.1    | 158.8     | 156.4     | 155.3     | 156.4     |
| 5    | 82.8     | 82.6      | 85.9      | 87.3      | 87.5      |
| 6    | 33.3     | 33.5      | 29.7      | 29.8      | 29.8      |
| 7    | 36.9     | 36.7      | 35.4      | 35.9      | 35.9      |
| 8    | 174.8    | 174.9     | 175.3     | 174.7     | 175.0     |
| 9    | 194.5    | 195.9     | 195.3     | 194.1     | 194.5     |
| 9a   | 107.8    | 107.5     | 107.5     | 107.5     | 107.9     |
| 10   | 40.0     | 39.8      | 40.5      | 39.7      | 40.4      |
| 10a  | 84.3     | 84.5      | 84.9      | 84.9      | 85.3      |
| 11   | 14.7     | 14.9      | 20.7      | 20.7      | 20.9      |
| 12   | 168.9    | 169.1     | 168.9     | 168.6     | 168.7     |
| 13   | 53.6     | 53.5      | 53.5      | 53.8      | 53.9      |
| 1'   | 158.9    | 159.2     | 161.6     | 161.7     | 161.8     |
| 2'   | 107.8    | 107.3     | 109.9     | 111.1     | 110.1     |
| 3'   | 141.1    | 141.2     | 140.8     | 142.0     | 141.6     |
| 4'   | 117.7    | 117.8     | 115.0     | 114.0     | 115.2     |
| 4a'  | 158.3    | 158.4     | 156.4     | 155.3     | 155.7     |
| 5'   | 82.3     | 76.2      | 85.9      | 87.3      | 86.5      |
| 6'   | 33.9     | 30.7      | 29.7      | 29.8      | 30.0      |
| 7'   | 35.2     | 40.2      | 35.4      | 35.9      | 35.7      |
| 8'   | 174.4    | 174.9     | 175.3     | 174.7     | 176.3     |
| 9'   | 194.0    | 194.1     | 195.3     | 194.1     | 194.8     |
| 9a'  | 107.0    | 107.5     | 107.5     | 107.5     | 107.3     |
| 10'  | 39.6     | 39.8      | 40.5      | 39.7      | 40.7      |
| 10a' | 85.7     | 86.8      | 84.9      | 84.9      | 85.0      |
| 11'  | 14.4     | 13.7      | 20.7      | 20.7      | 21.0      |
| 12'  | 168.7    | 169.1     | 168.9     | 168.6     | 169.1     |
| 13'  | 53.6     | 53.7      | 53.5      | 53.8      | 54.0      |



**Table S14.** Cytotoxic activities against MIA-PaCa-2 cell line of 1–13

| Compounds | Inhibition rate (%) in 10 $\mu$ M | IC <sub>50</sub> ( $\mu$ M) |
|-----------|-----------------------------------|-----------------------------|
| <b>1</b>  | 0.68                              |                             |
| <b>2</b>  | 0.05                              |                             |
| <b>3</b>  | 5.21                              |                             |
| <b>4</b>  | 0.92                              |                             |
| <b>5</b>  | 5.23                              |                             |
| <b>6</b>  | 11.21                             |                             |
| <b>7</b>  | 58.41                             |                             |
| <b>8</b>  | 71.96                             | 2.6                         |
| <b>9</b>  | 76.82                             | 2.1                         |
| <b>10</b> | 6.94                              |                             |
| <b>11</b> | 5.25                              |                             |
| <b>12</b> | 0.45                              |                             |
| <b>13</b> | 1.99                              |                             |

**Table S15.** Antibacterial activities (MIC,  $\mu$ g/mL) of 1–13

| Microorganism                  | strain no.    | <b>1</b> | <b>2</b> | <b>3</b> | <b>4</b> | <b>5</b> | <b>6</b> | <b>7</b> | <b>8</b> | <b>9</b> | <b>10</b> | <b>11</b> | <b>12</b> | <b>13</b> | levofloxacin |
|--------------------------------|---------------|----------|----------|----------|----------|----------|----------|----------|----------|----------|-----------|-----------|-----------|-----------|--------------|
| <i>Escherichia coli</i>        | ATCC 25922    | >64      | >64      | >64      | >64      | >64      | >64      | >64      | >64      | >64      | >64       | >32       | >32       | >32       | $\leq$ 0.03  |
| <i>Pseudomonas syringae</i>    | CPCC 101099   | >64      | >64      | >64      | >64      | >64      | >64      | >64      | >64      | >64      | >64       | >32       | >32       | >32       |              |
| <i>Bacillus cereus</i>         | CPCC 101254   | >64      | >64      | >64      | >64      | >64      | >64      | >64      | 32       | >64      | 4         | >32       | >32       | >32       |              |
| <i>Enterococcus faecalis</i>   | ATCC 29212    | >64      | >64      | >64      | >64      | >64      | >64      | >64      | >64      | >64      | >64       | >32       | >32       | >32       | 1            |
| <i>Enterococcus faecium</i>    | ATCC 700221   | >64      | >64      | >64      | >64      | >64      | >64      | >64      | >64      | >64      | >64       | >32       | >32       | >32       | 128          |
| <i>Klebsiella pneumoniae</i>   | ATCC BAA-2146 | >64      | >64      | >64      | >64      | >64      | >64      | >64      | >64      | >64      | >64       | >32       | >32       | >32       | >128         |
| <i>Staphylococcus aureus</i>   | ATCC 33591    | >64      | >64      | >64      | >64      | >64      | >64      | >64      | >64      | >64      | >64       | >32       | >32       | >32       | 0.25         |
| <i>Pseudomonas aeruginosa</i>  | 13-17         | >64      | >64      | >64      | >64      | >64      | >64      | >64      | >64      | >64      | >64       | >32       | >32       | >32       |              |
| <i>Acinetobacter baumannii</i> | 12-8          | >64      | >64      | >64      | >64      | >64      | >64      | >64      | >64      | >64      | >64       | >32       | >32       | >32       |              |

Figure S10. <sup>1</sup>H NMR spectrum of 1 in DMSO-*d*<sub>6</sub>

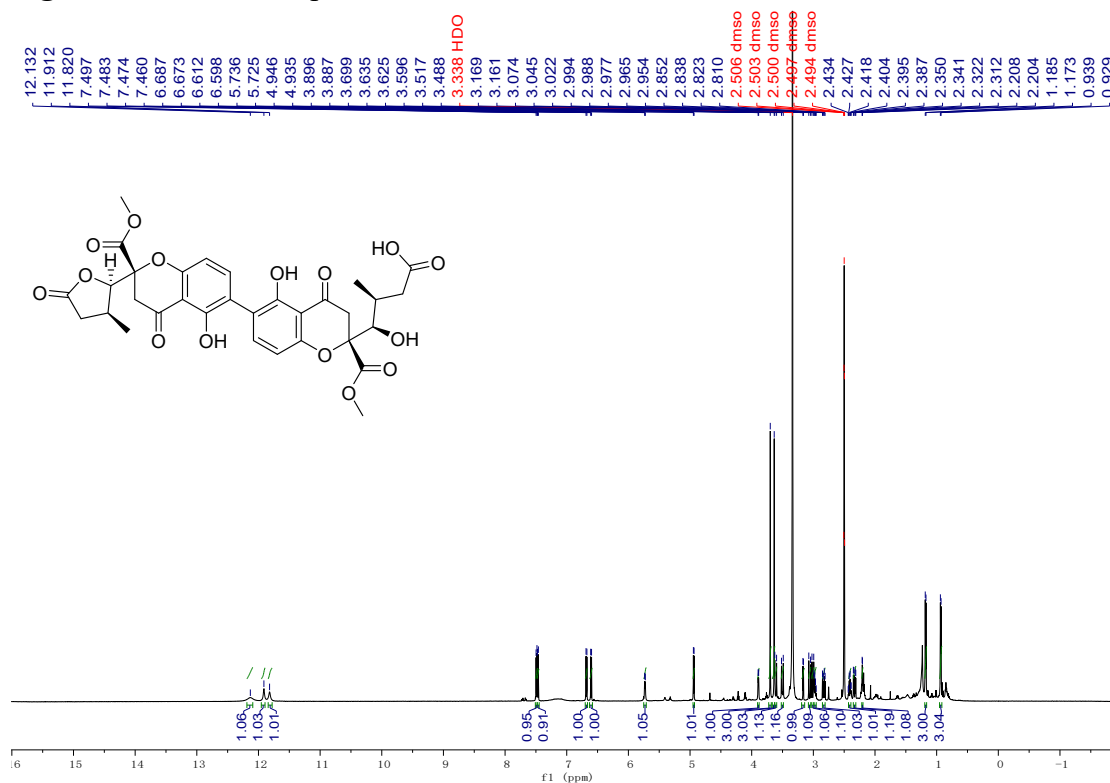

Figure S11. <sup>13</sup>C NMR spectrum of 1 in DMSO-*d*<sub>6</sub>

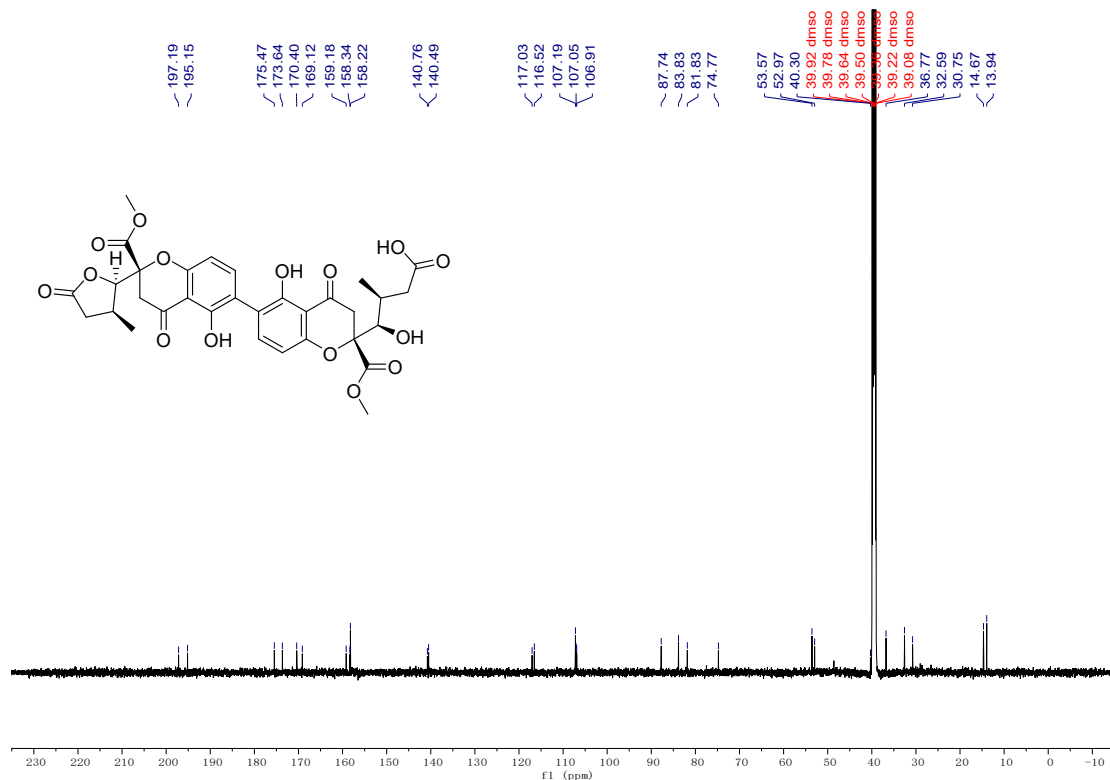

**Figure S12.** DEPT spectra of **1** in DMSO-*d*<sub>6</sub>

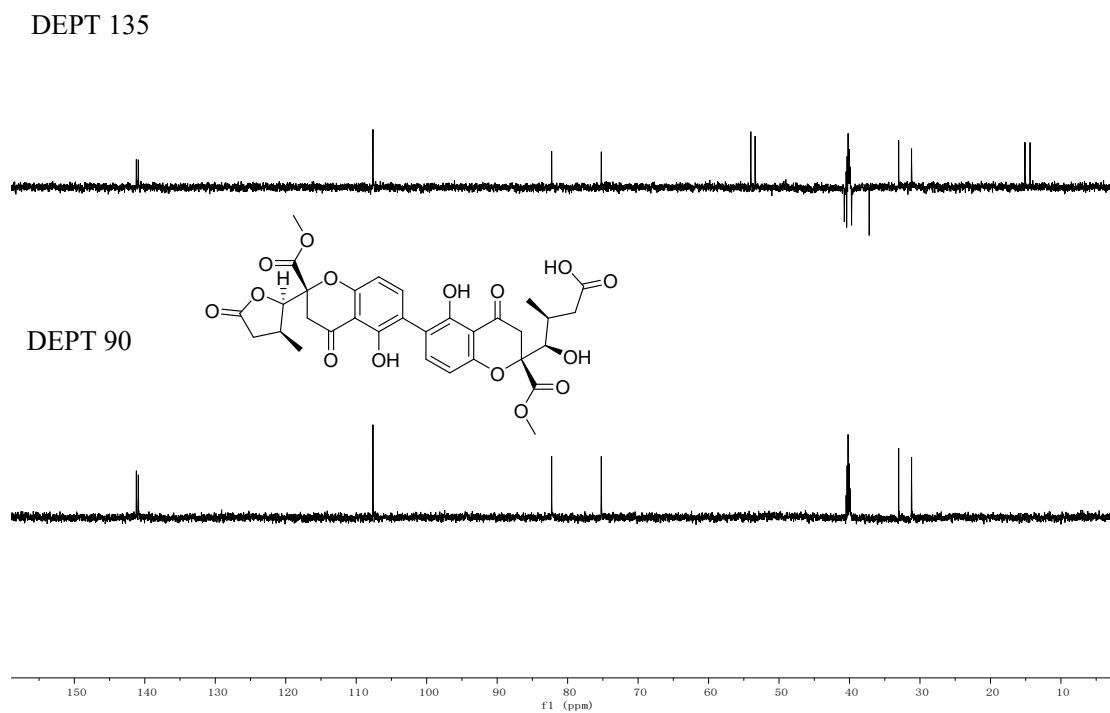

**Figure S13.** <sup>1</sup>H-<sup>1</sup>H COSY spectrum of **1** in DMSO-*d*<sub>6</sub>

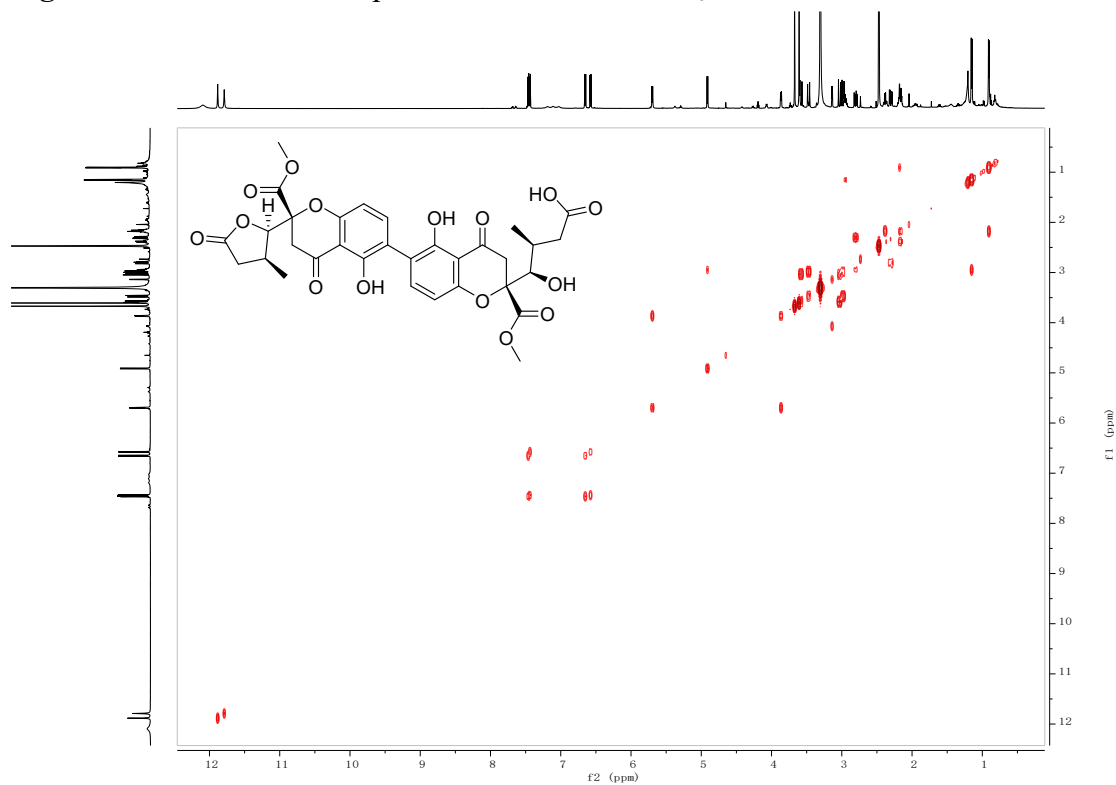

Figure S14. HSQC spectrum of **1** in DMSO-*d*<sub>6</sub>

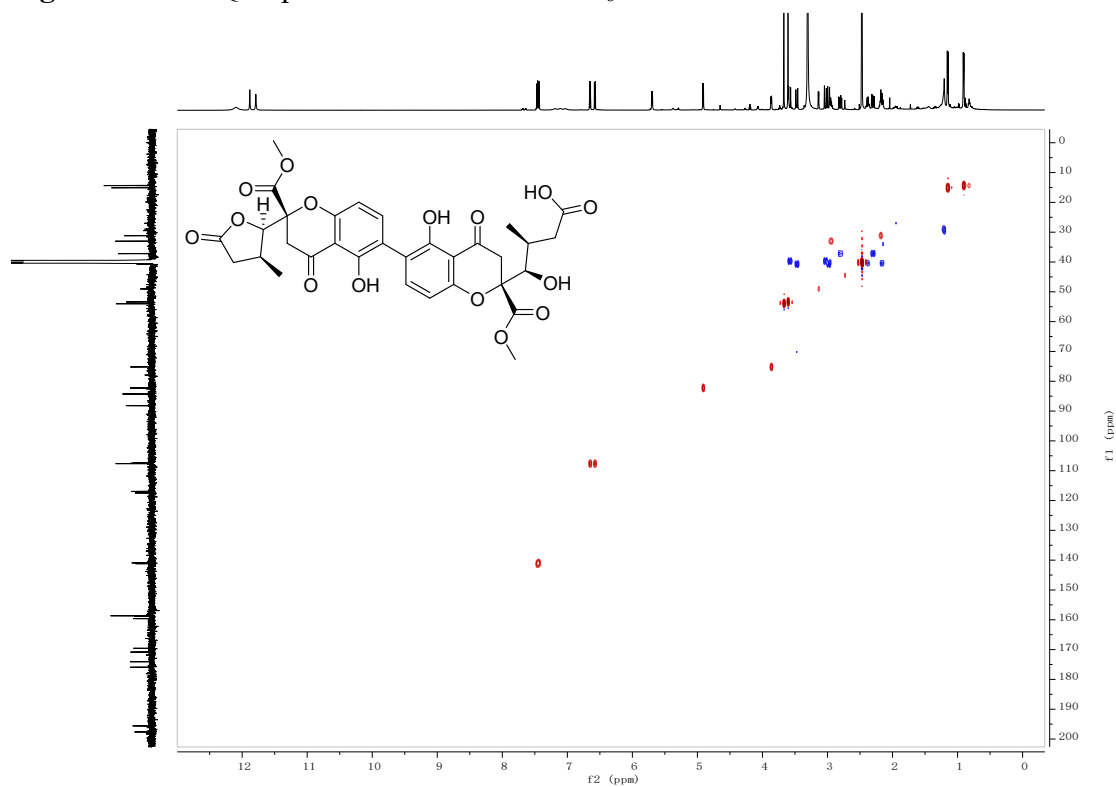

Figure S15. HMBC spectrum of **1** in DMSO-*d*<sub>6</sub>

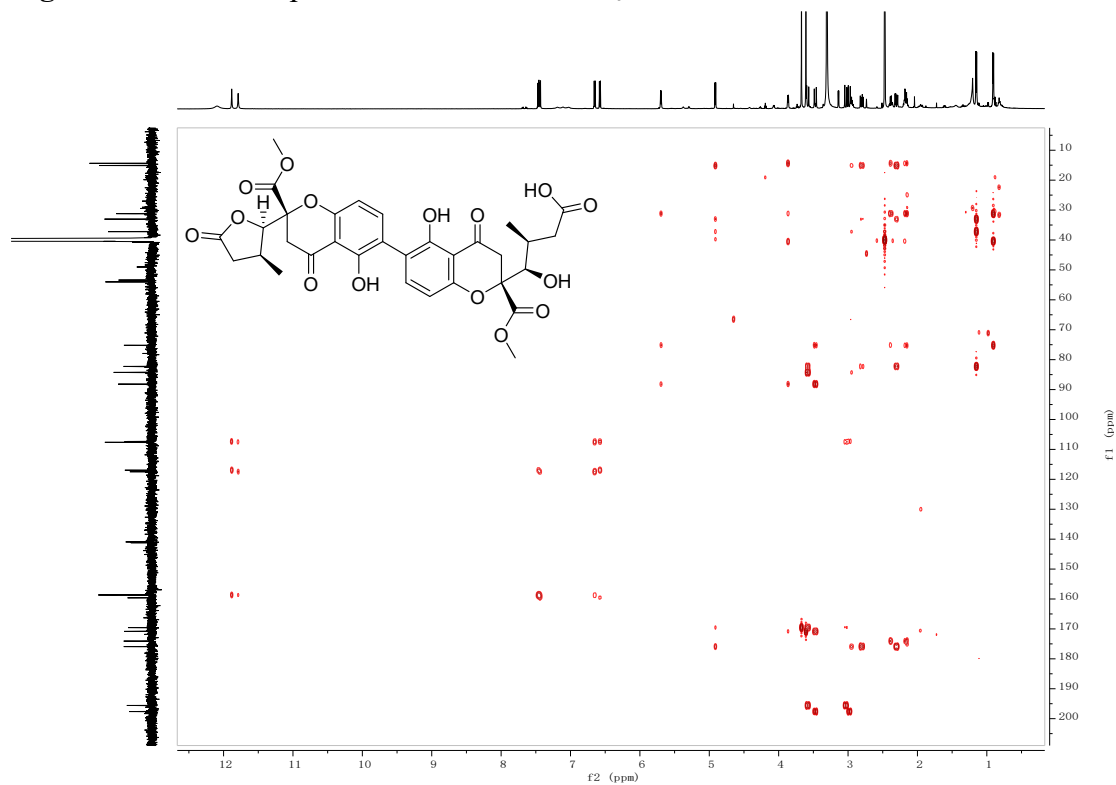

Figure S16. NOESY spectrum of **1** in DMSO-*d*<sub>6</sub>

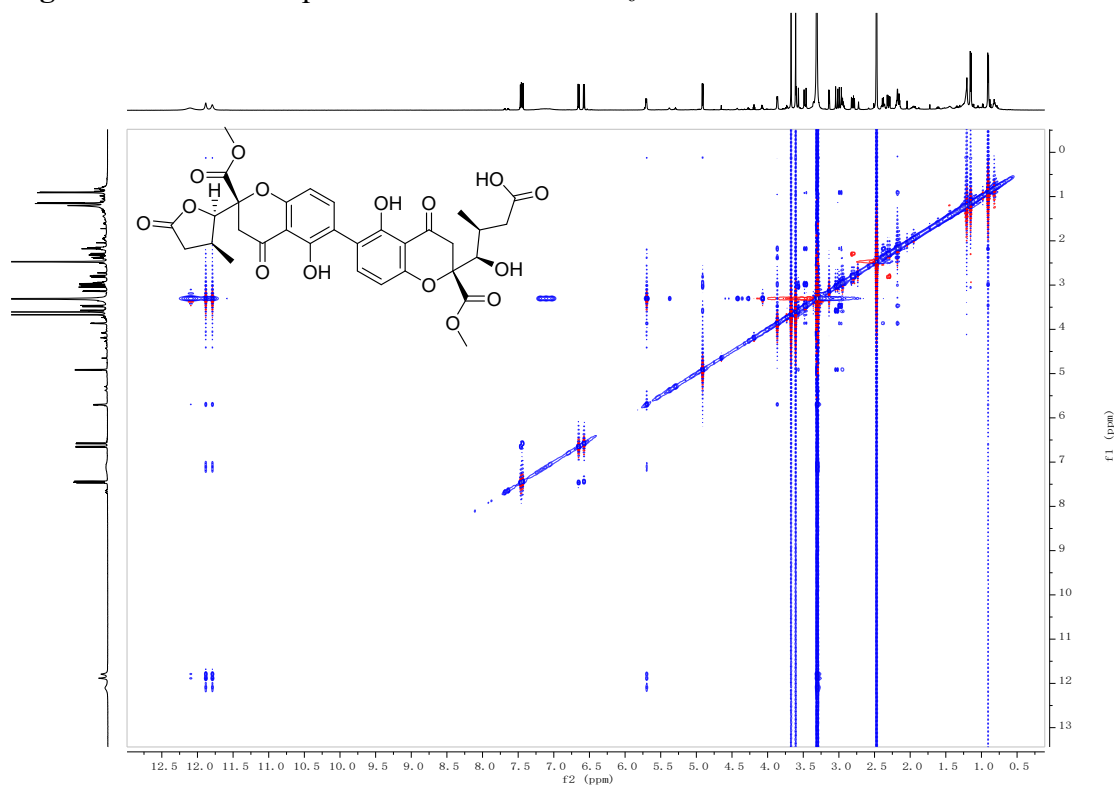

Figure S17. HRESIMS spectrum of **1**

1 #26 RT: 0.22 AV: 1 NL: 3.94E6  
F: FTMS + p ESI Full ms [200.00-4000.00]

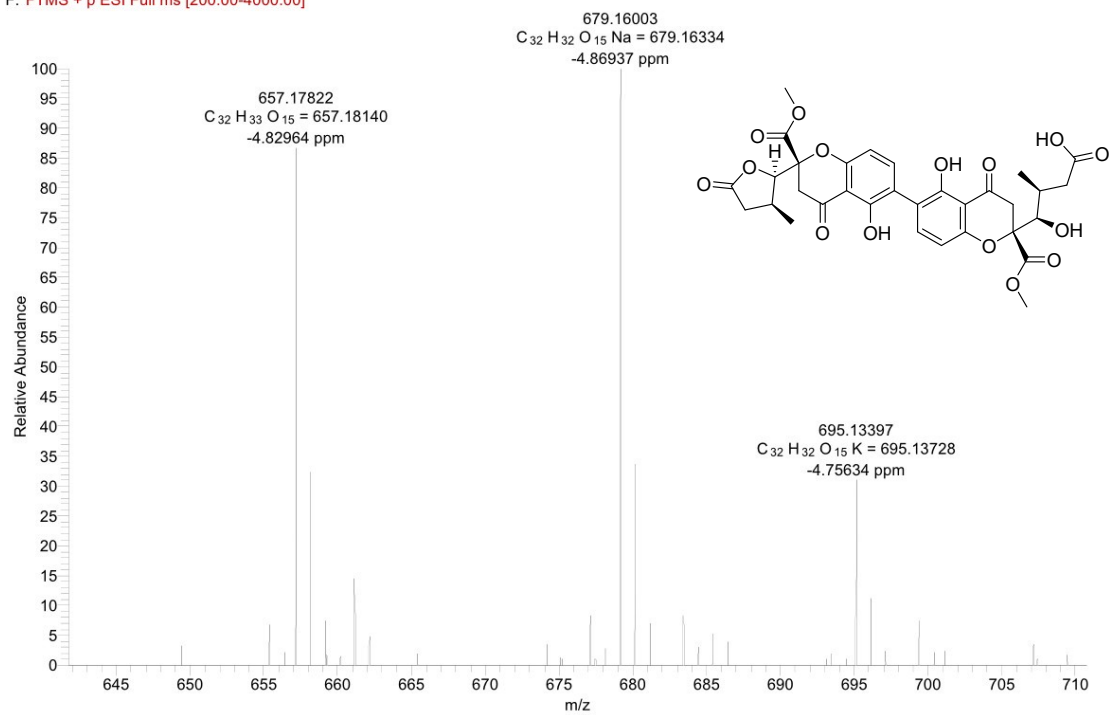

**Figure S18. IR spectrum of 1**

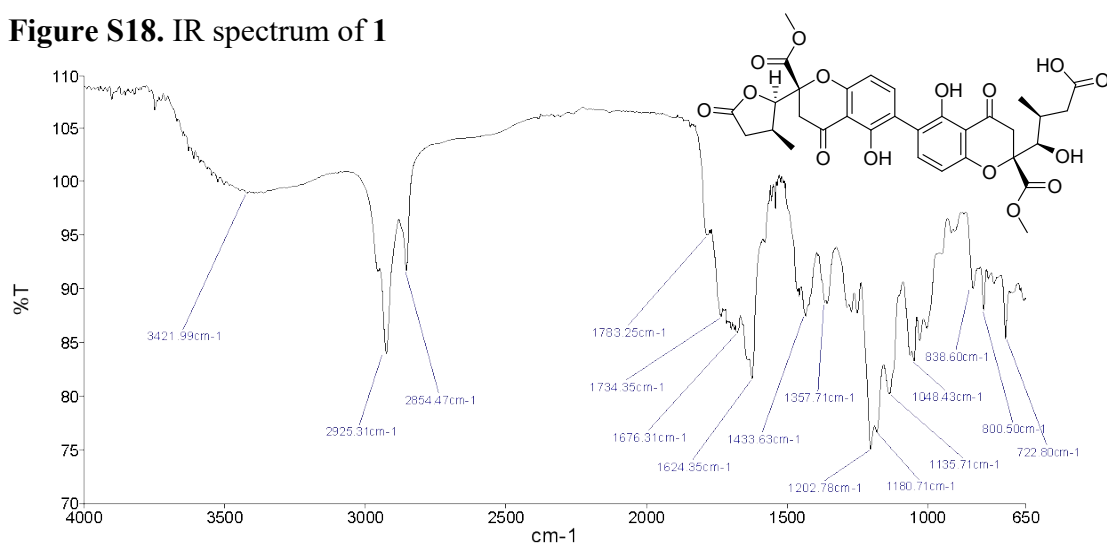

傅立叶变换显微镜红外 (FT-IR Microscope)

**Figure S19. UV spectrum of 1**

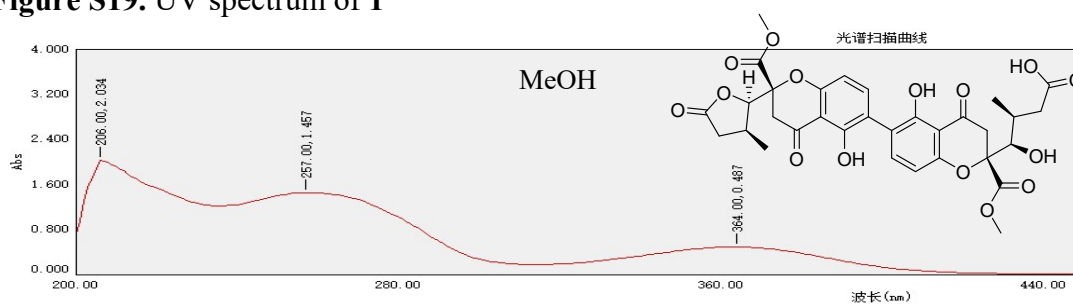

**Figure S20. ECD spectrum of 1**

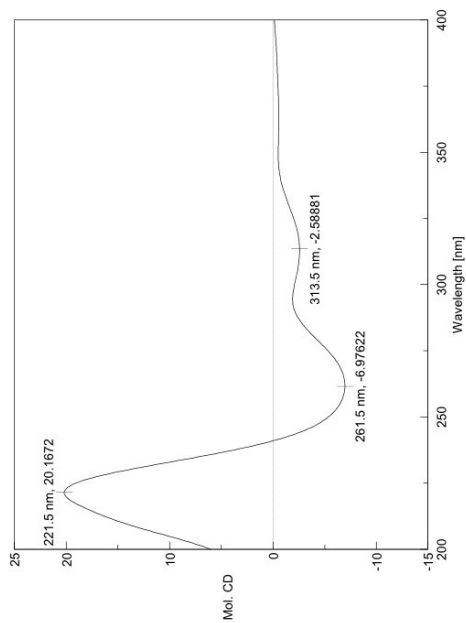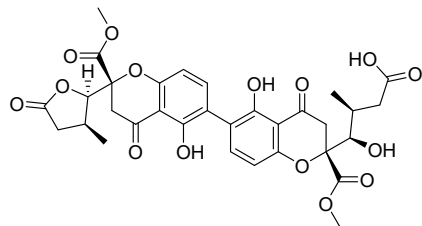

[Comments]  
 Sample name 114h-16-1-1  
 Comment  
 Measurement Information  
 Measurement Name Mol. CD  
 Sample Name 114h-16-1-12-6-mjw  
 Serial No. A024461168  
 Accessory Standard  
 Accessory S/N A005461185  
 Cell Length 1 mm  
 Measurement date 2021/7/5 10:37  
 Photometric Mode CD, HT, Abs  
 Measure Range 400 - 200 nm  
 Wavelength Interval 2 nm  
 Scan Rate Standard  
 D.T. 1 sec  
 Bandwidth 1.00 nm  
 Start Mode Immediately  
 Scanning Speed 100 nm/min  
 Slit Width 1.00 nm  
 Slit Function  
 Slit Control Auto  
 CD Detector PMT  
 PMT Voltage Auto  
 Accumulations 2  
 Solvent MeOH  
 Concentration 0.3 (wtv)%

[Detailed Information]  
 Creation date 2021/7/5 14:23  
 Data array type Linear data array \* 3  
 Horizontal axis Wavelength [nm]  
 Vertical axis(1) Mol. CD  
 Vertical axis(2) HT [V]  
 Vertical axis(3) Abs  
 Start 400 nm  
 End 200 nm  
 Data interval 0.5 nm  
 Data points 401

Figure S21. <sup>1</sup>H NMR spectrum of **2** in CDCl<sub>3</sub>

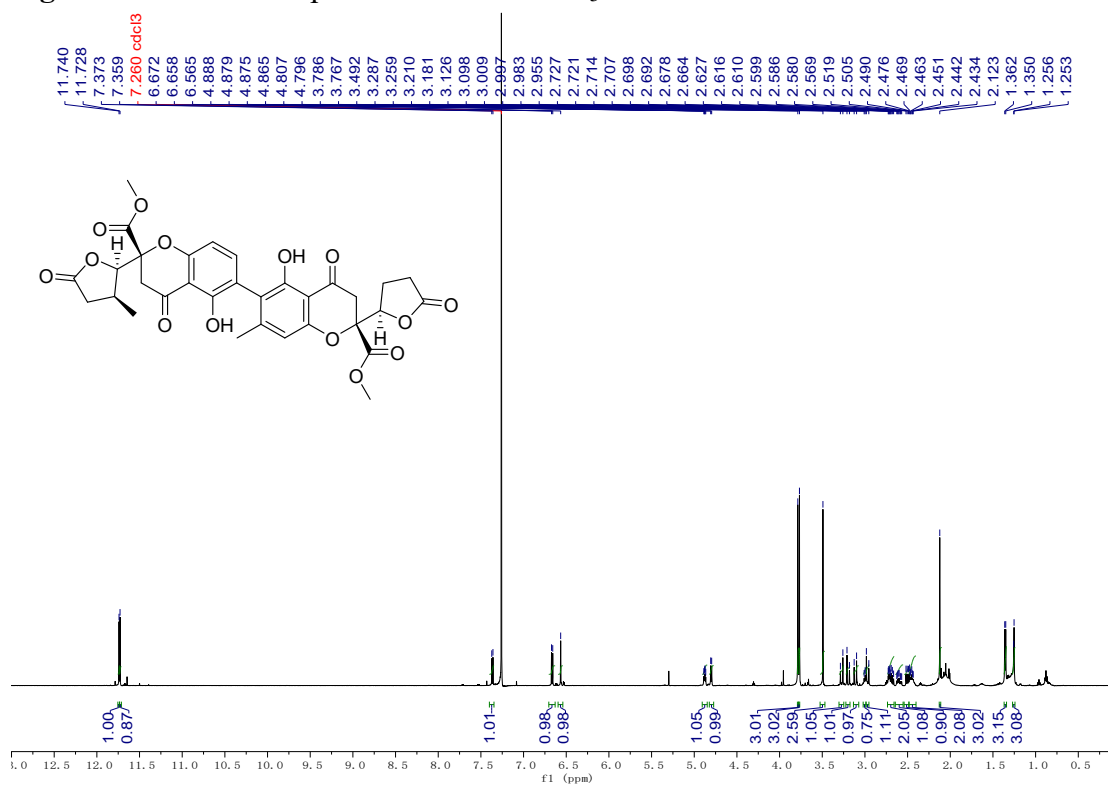

Figure S22. <sup>13</sup>C NMR spectrum of **2** in CDCl<sub>3</sub>

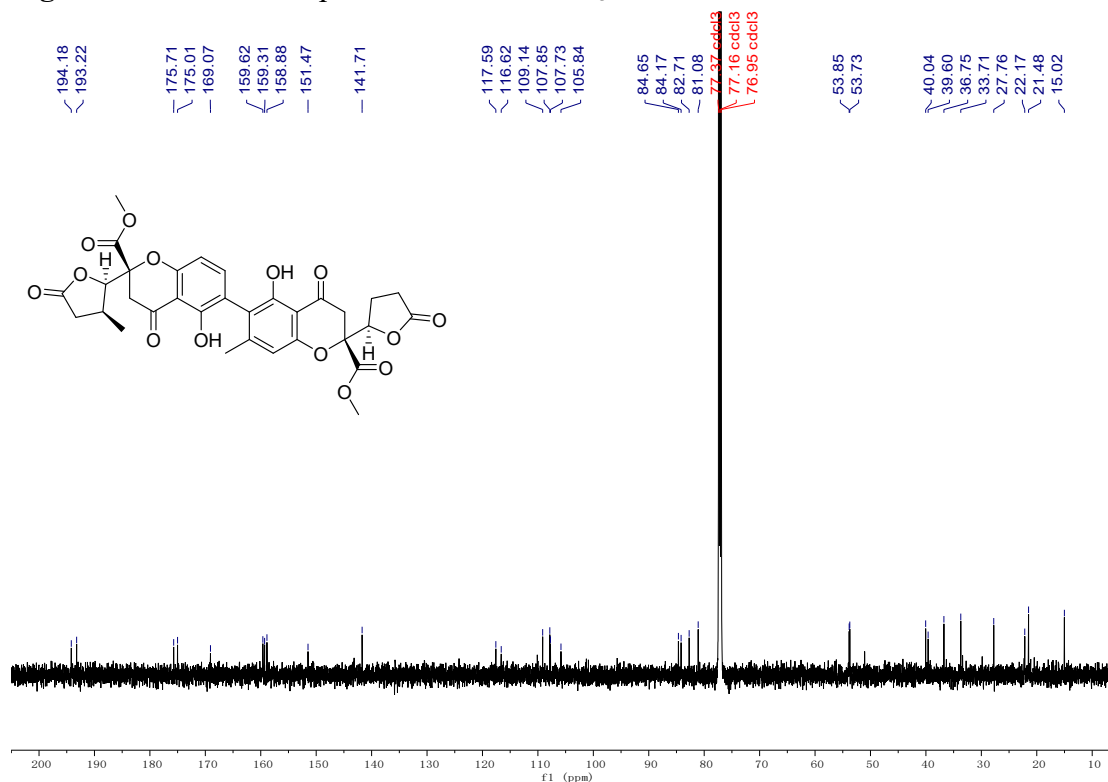



Figure S23. DEPT spectra of **2** in CDCl<sub>3</sub>

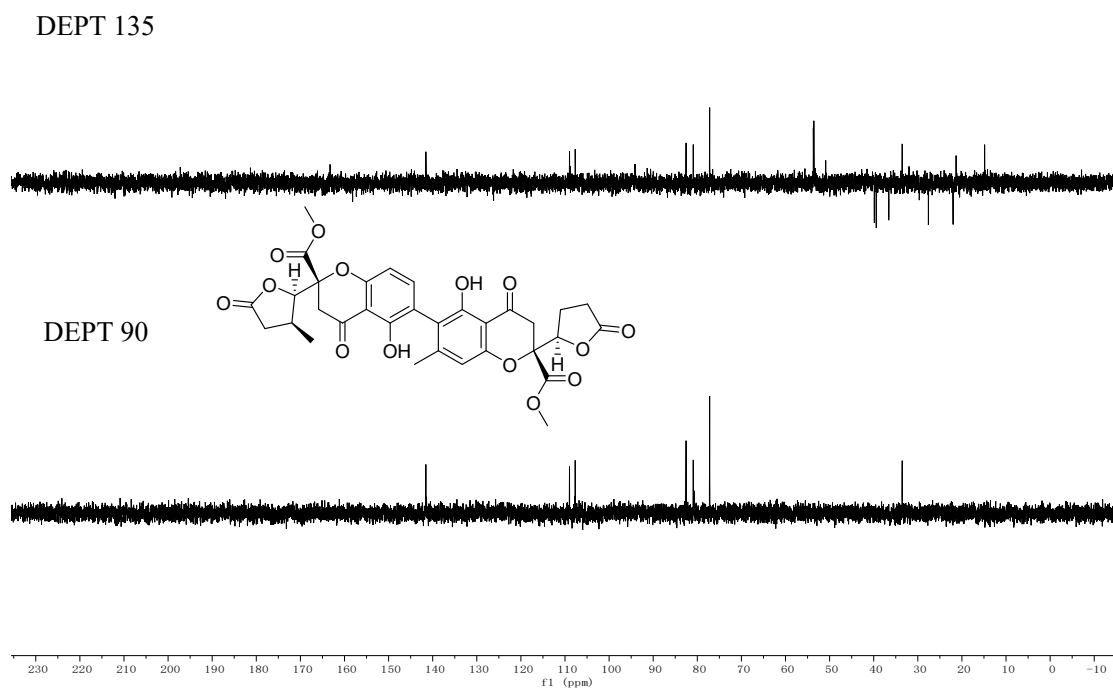

Figure S24. <sup>1</sup>H-<sup>1</sup>H COSY spectrum of **2** in CDCl<sub>3</sub>

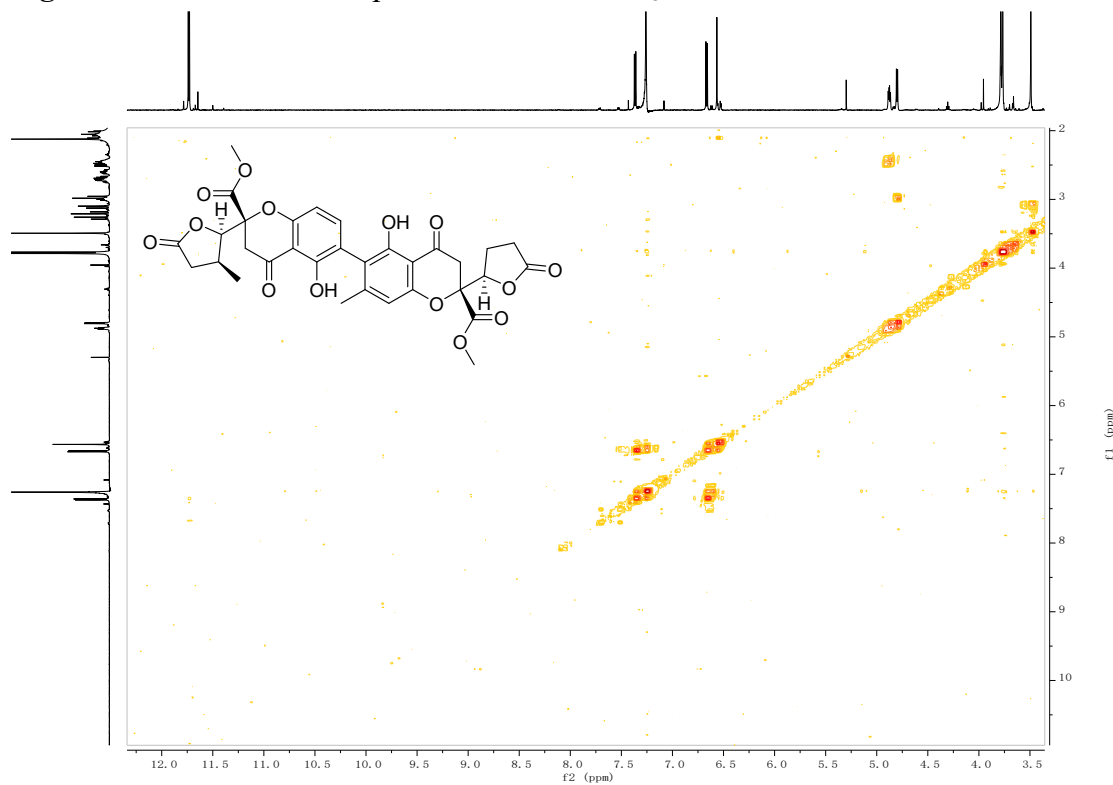

Figure S25. HSQC spectrum of **2** in CDCl<sub>3</sub>

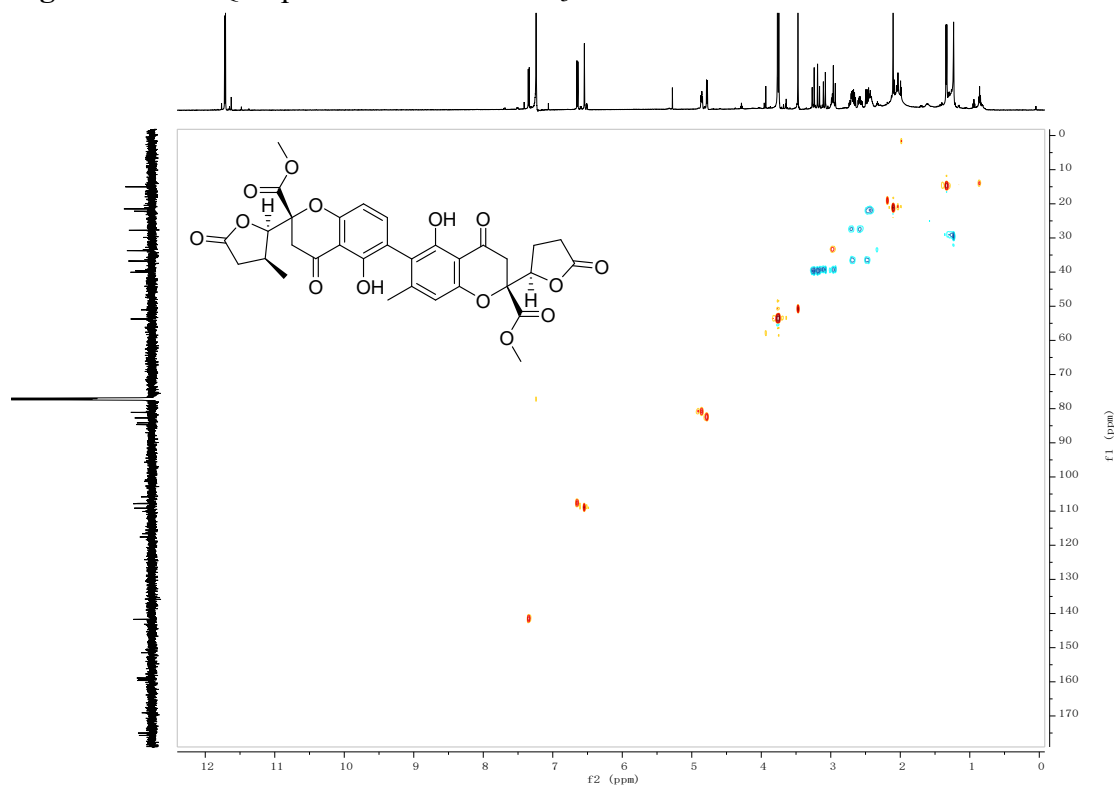

Figure S26. HMBC spectrum of **2** in CDCl<sub>3</sub>

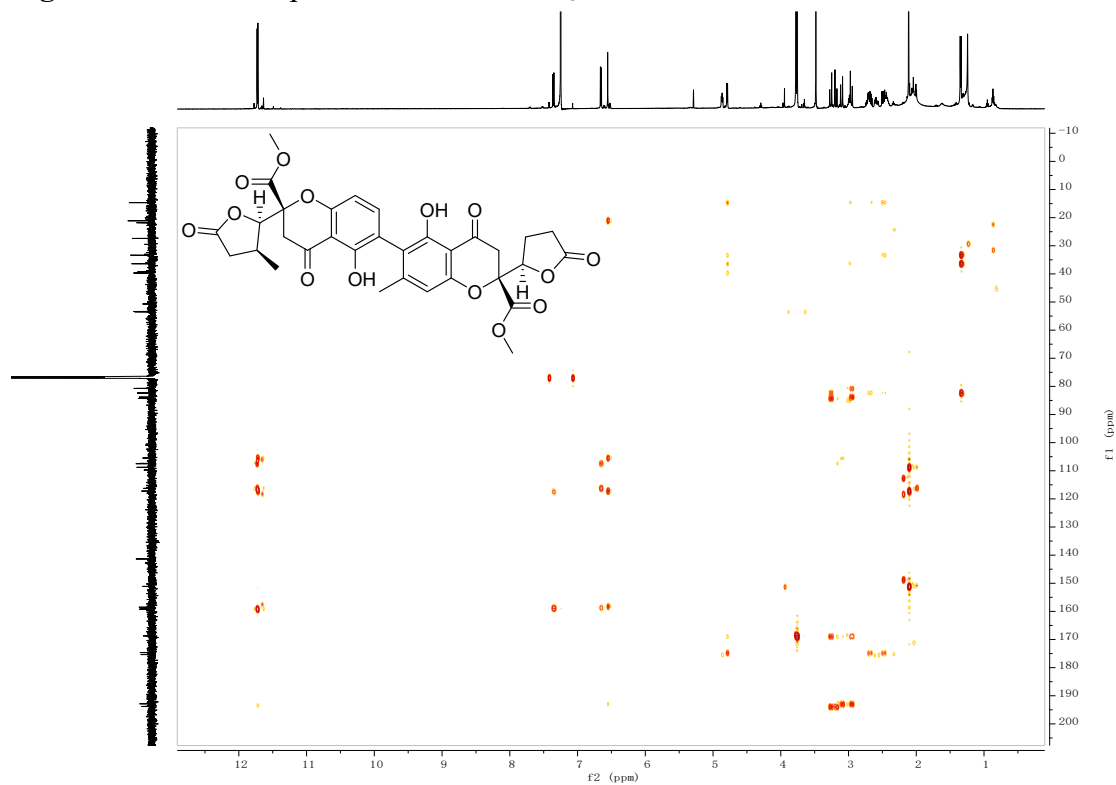

**Figure S27.** NOESY spectrum of **2** in CDCl<sub>3</sub>

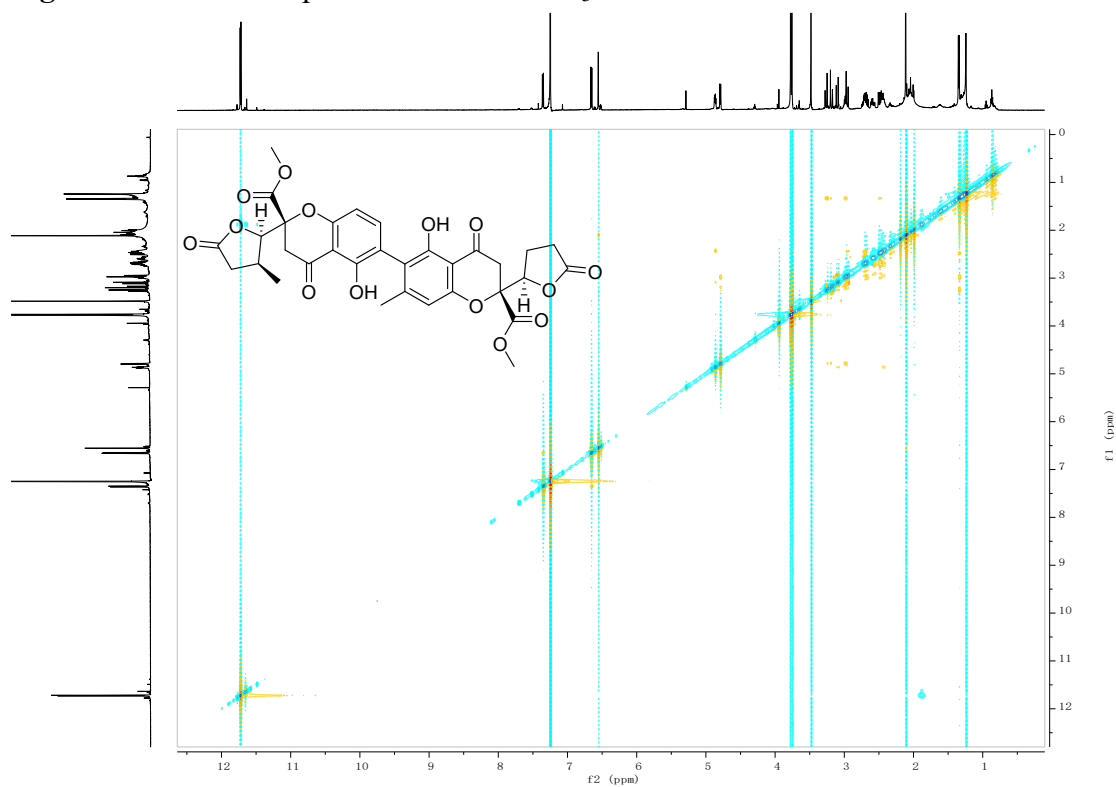

**Figure S28.** HRESIMS spectrum of **2**

**2** #18 RT: 0.14 AV: 1 NL: 1.29E5  
F: FTMS + p ESI Full ms [200.00-4000.00]

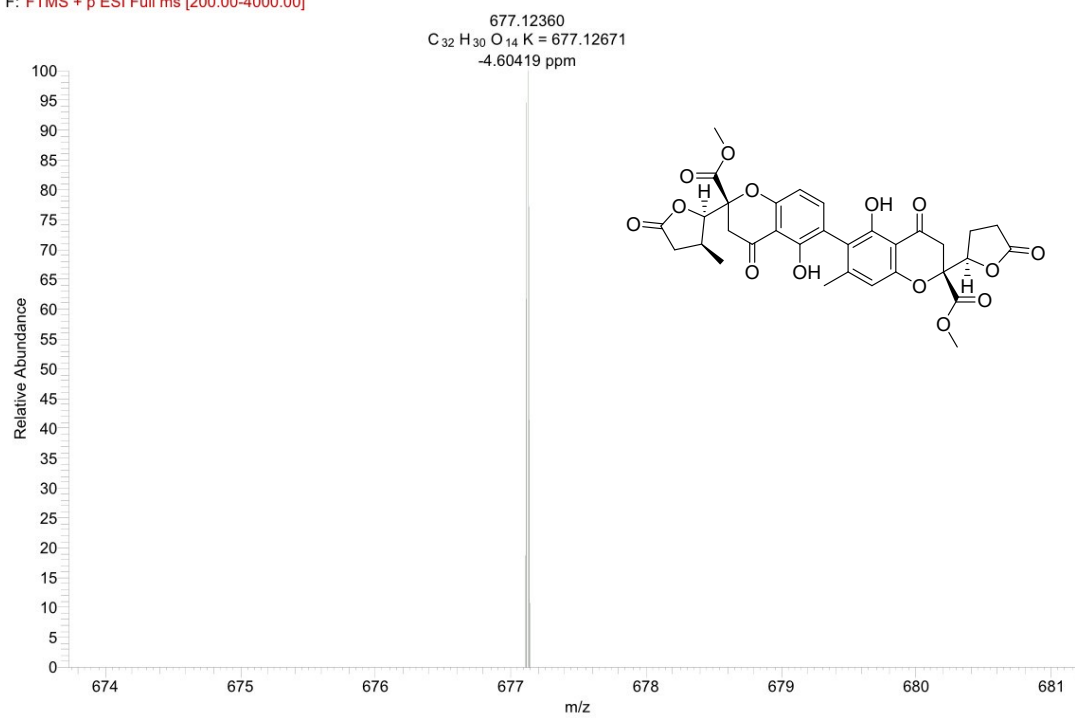

Figure S29. IR spectrum of **2**

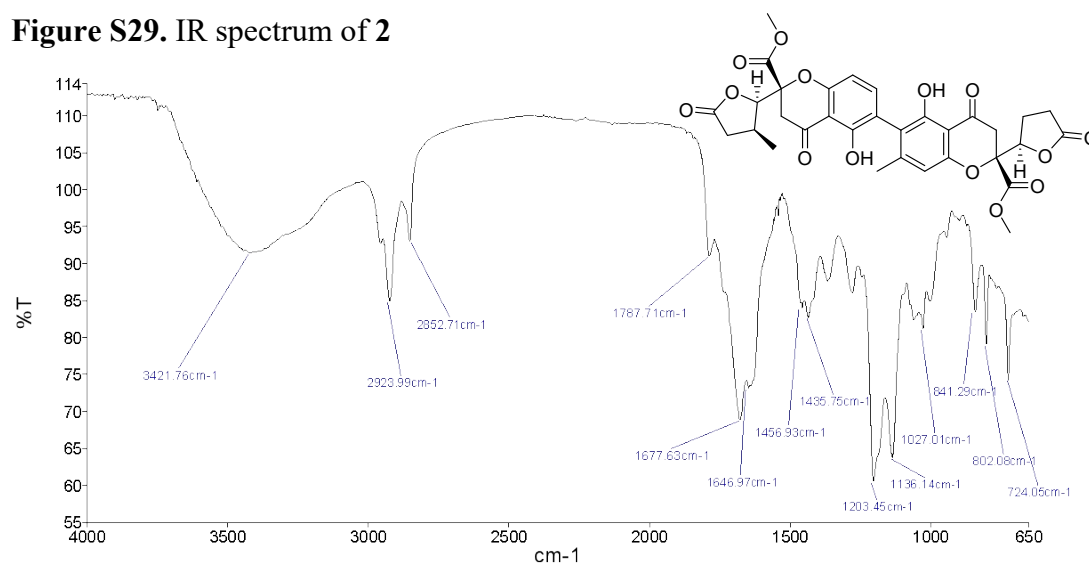

傅立叶变换显微镜红外 (FT-IR Microscope)

Figure S30. UV spectrum of **2**

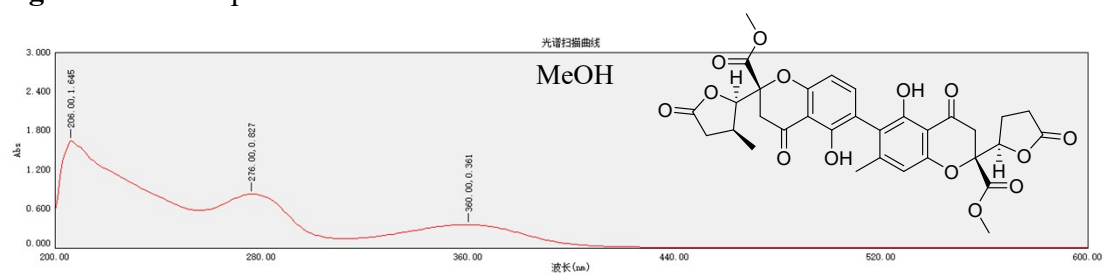

Figure S31. ECD spectrum of **2**

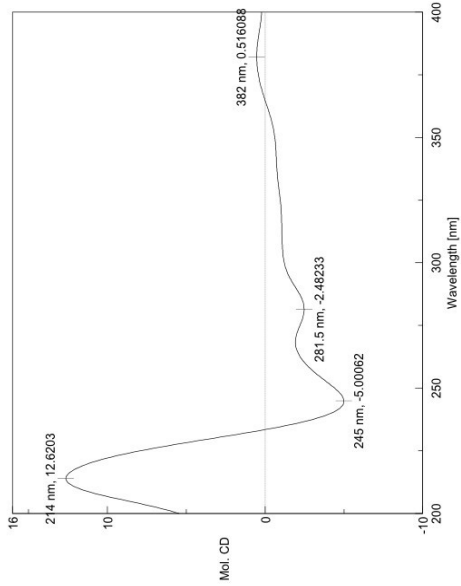

[Comments]  
 Sample name 114h-21-2-2  
 Comment

[Measurement Information]  
 Wavelength 114h-21-2-2-1-s-m.jw  
 Measurement Name 114h-21-2-2-1-s-m.jw  
 Measurement Date 2021/7/5  
 Serial No. A024481168

Accessory Standard  
 Accessory S/N A005461165  
 Cell Length 1 mm

Measurement date 2021/7/5 10:53

Photometric Mode CD, HT, Abs  
 Wavelength Range 0.5 ~ 200 nm  
 Wavelength Step 0.5 nm  
 Sensitivity Standard  
 D.I.T. 1 sec  
 Bandwidth 1.00 nm  
 Start Mode Immediately  
 Stop Mode 30 min  
 Baseline Correction Baseline  
 Shutter Control Auto  
 CD Detector PMT  
 PMT Voltage Auto  
 Accumulations 2  
 Solvent MeOH  
 Concentration 0.5 (mg)/%

[Detailed Information]  
 Creation date 2021/7/5 14:25  
 Data array type Linear data array \* 3  
 Wavelength (nm) HT [V]  
 Vertical axis(1) Molar CD  
 Vertical axis(2) HT [V]  
 Vertical axis(3) Abs  
 Start 400 nm  
 End 200 nm  
 Data interval 0.5 nm  
 Data points 401

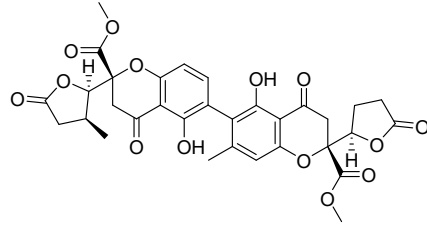

Figure S32.  $^1\text{H}$  NMR spectrum of **3** in  $\text{DMSO-}d_6$

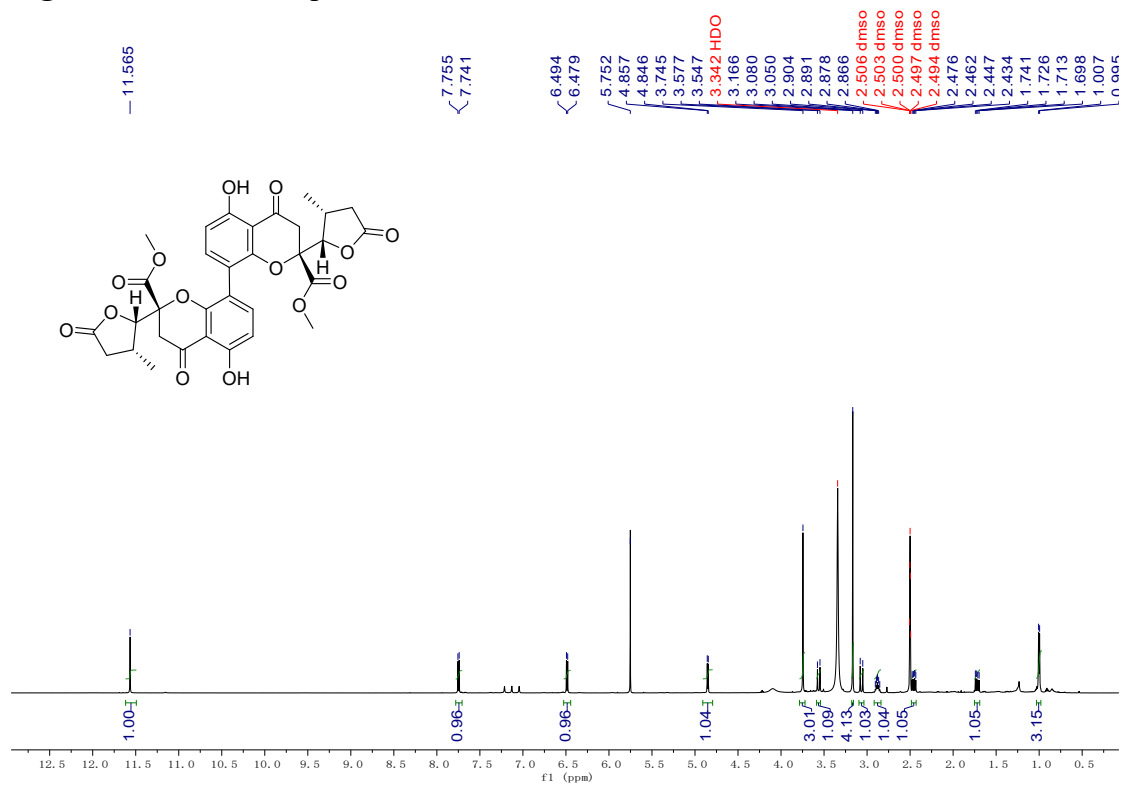

Figure S33.  $^{13}\text{C}$  NMR spectrum of **3** in  $\text{DMSO-}d_6$

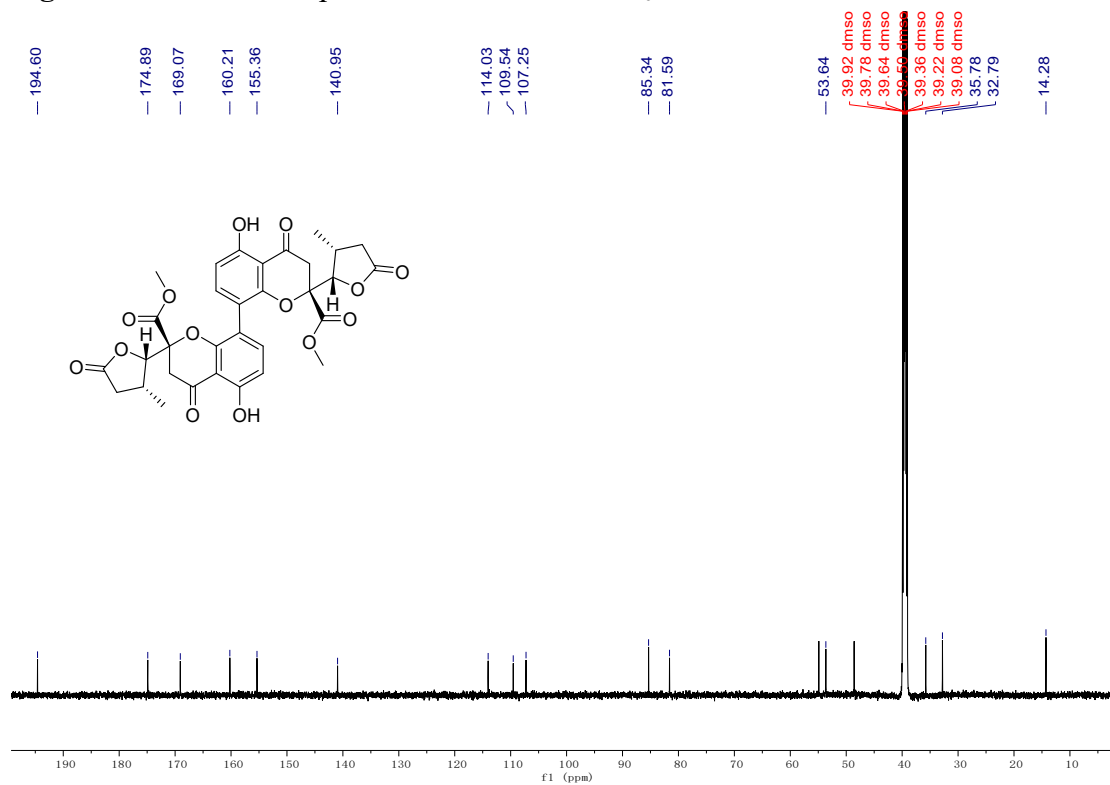

**Figure S34.** DEPT spectra of **3** in DMSO-*d*<sub>6</sub>

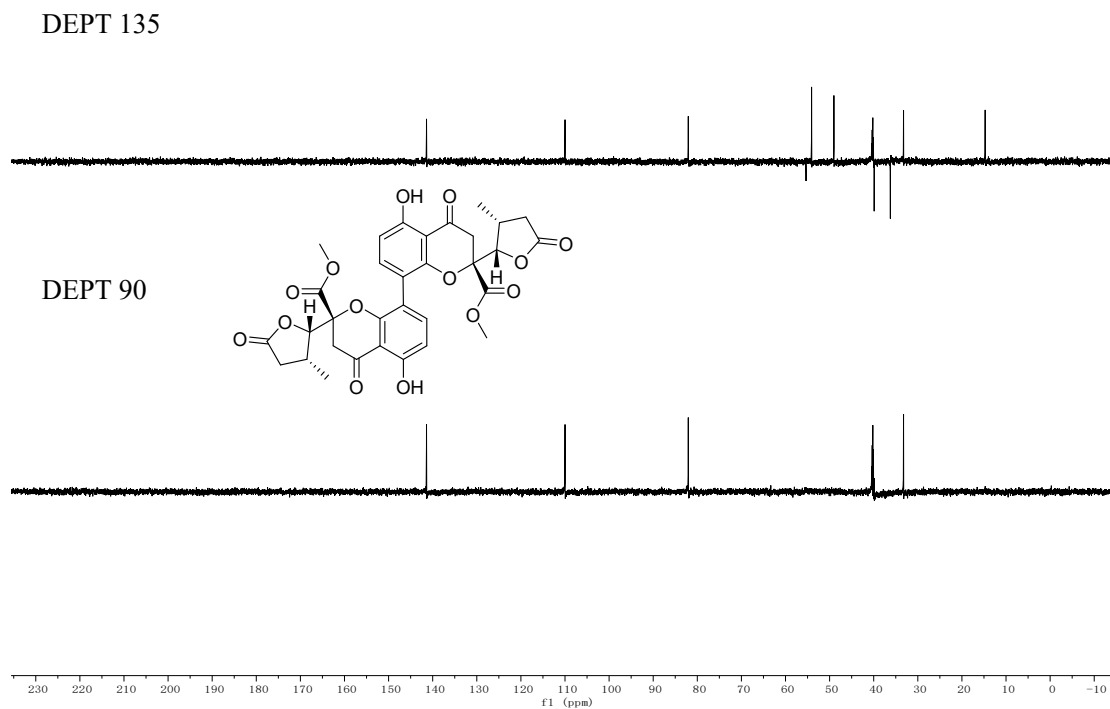

**Figure S35.** <sup>1</sup>H-<sup>1</sup>H COSY spectrum of **3** in DMSO-*d*<sub>6</sub>

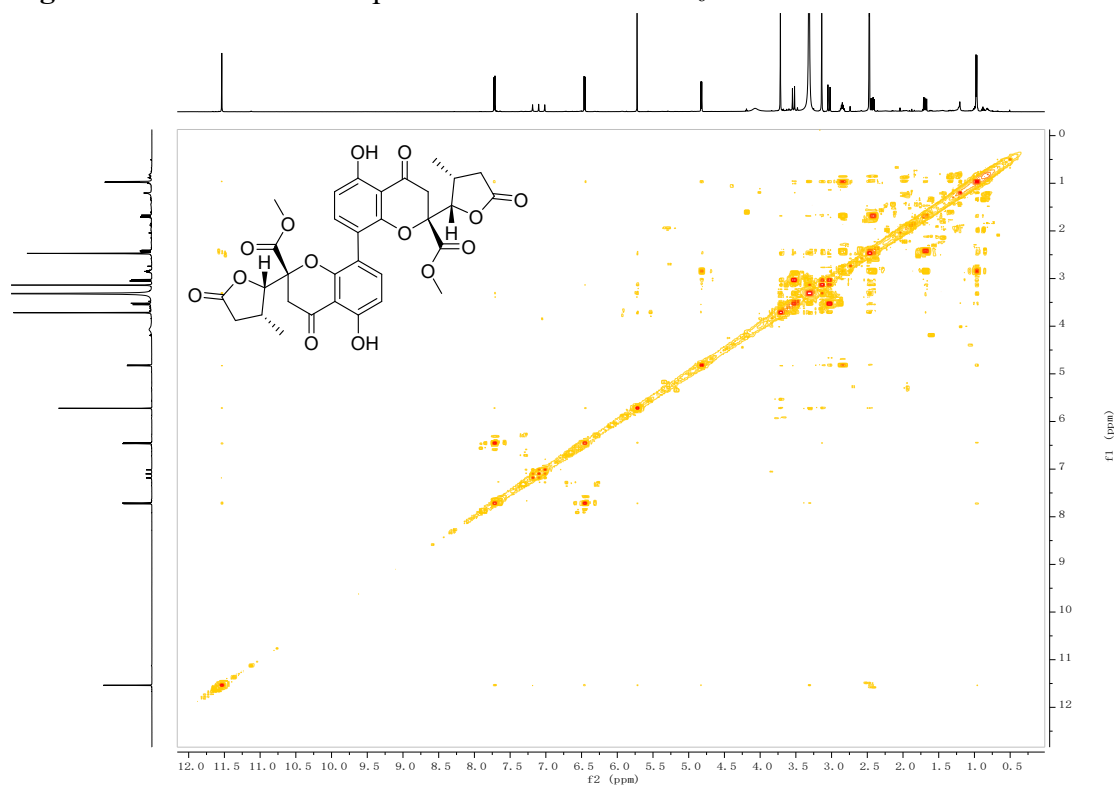

Figure S36. HSQC spectrum of **3** in DMSO-*d*<sub>6</sub>

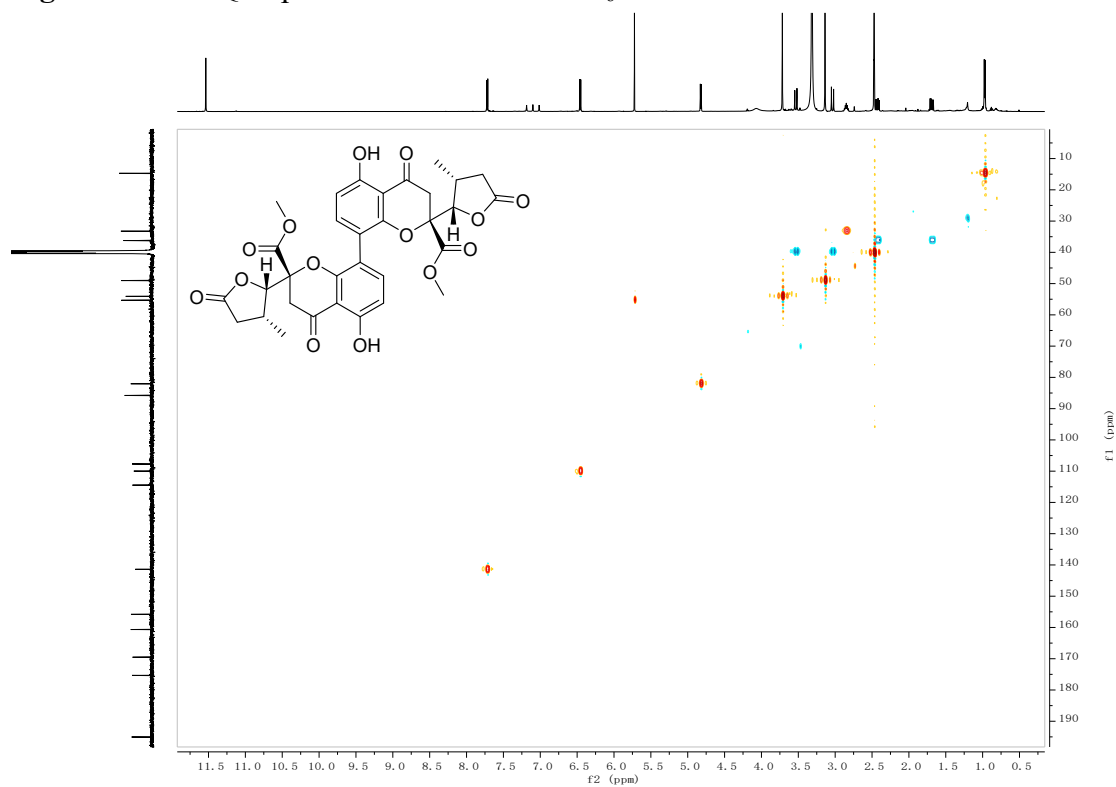

Figure S37. HMBC spectrum of **3** in DMSO-*d*<sub>6</sub>

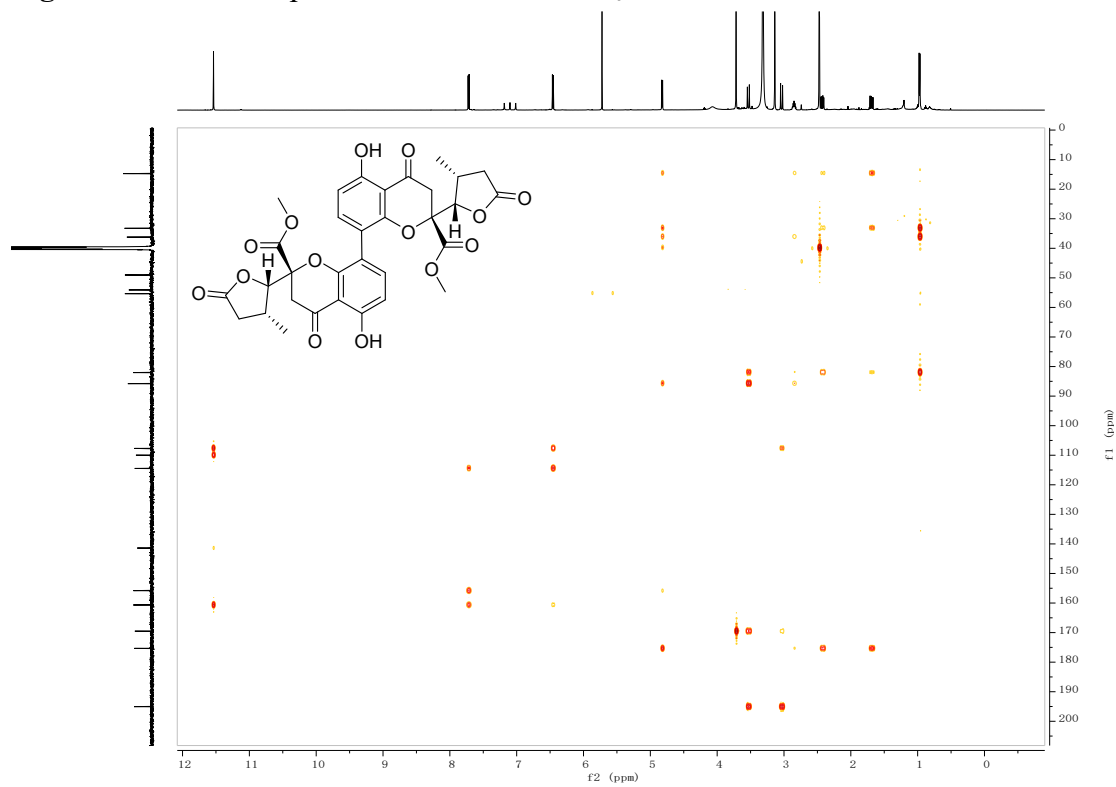



**Figure S38.** NOESY spectrum of **3** in DMSO-*d*<sub>6</sub>

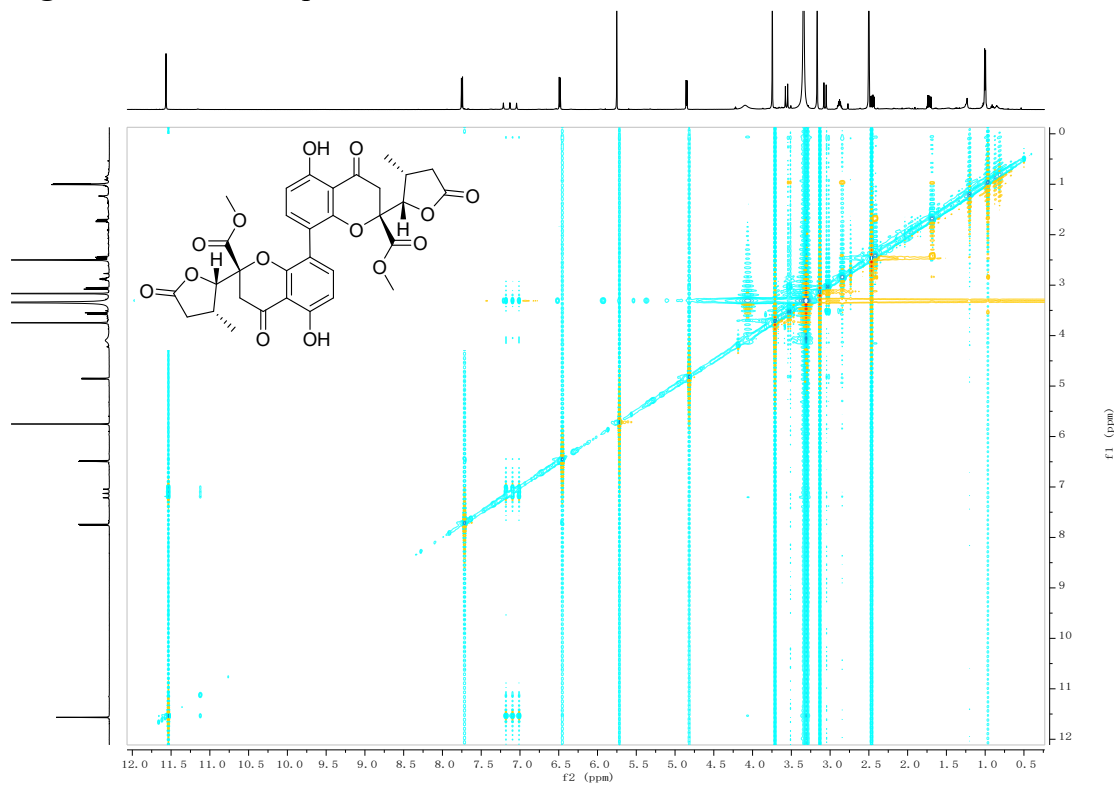

**Figure S39.** HRESIMS spectrum of **3**

**3** #24 RT: 0.21 AV: 1 NL: 1.06E7  
F: FTMS + p ESI Full ms [200.00-4000.00]

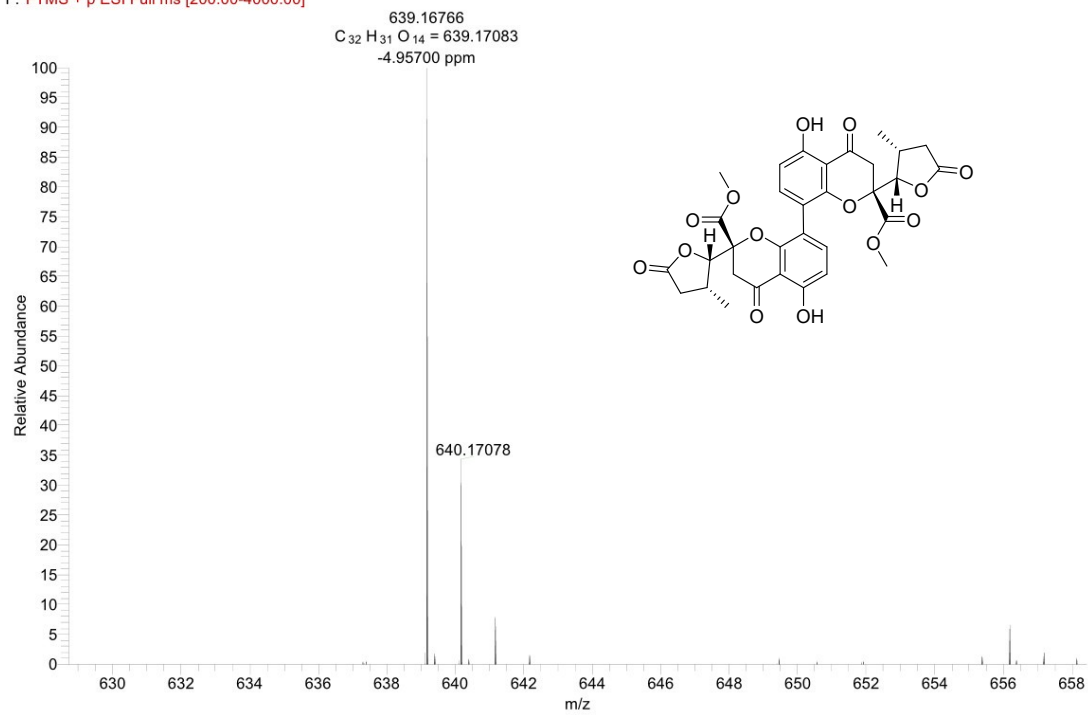

Figure S40. IR spectrum of 3

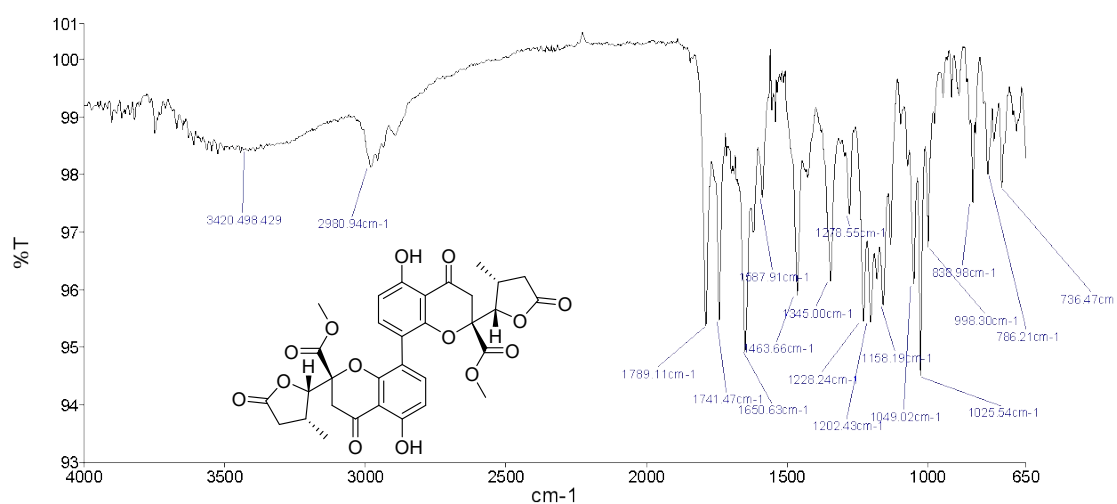

傅立叶变换显微镜红外 (FT-IR Microscope)

Figure S41. UV spectrum of 3

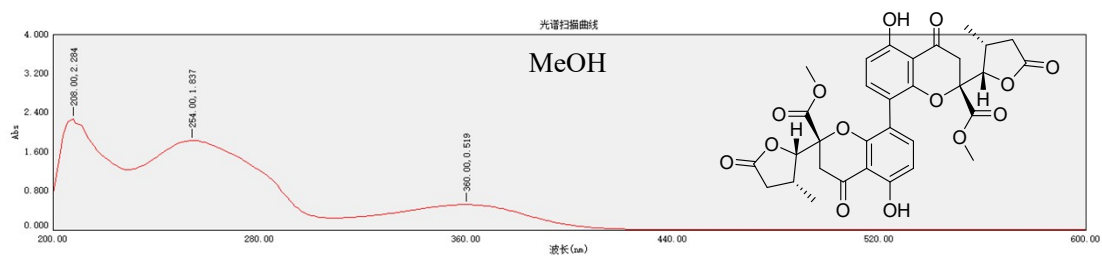

Figure S42. ECD spectrum of 3

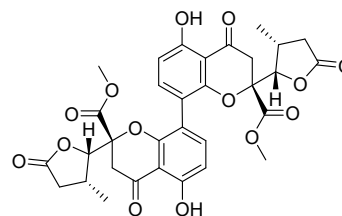

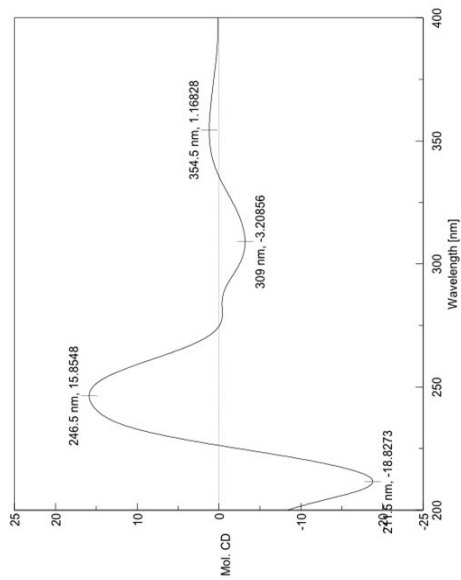

[Comments] Sample name 114h-21-3-1  
 Comment 114h-21-3-1-1-5-mj.w

[Measurement Information]  
 Measurement Name 114h-21-3-1-1-5-mj.w  
 Operator JMHS  
 Sample No. A024461168  
 Serial No.

Accessory Standard  
 Accessory SN A005461185  
 Cell Length 1 mm

Measurement date 2021/7/15 11:06

Photometric Mode CD, HT, Abs  
 Wavelength Range 400 - 200 nm  
 Wavelength Step 0.5 nm  
 Sensitivity Standard  
 D.I.T. 1 sec  
 Bandwidth 1.00 nm  
 Start Mode Immediately  
 Stop Mode 10 min  
 Baseline Correction Baseline  
 Shutter Control Auto  
 CD Detector PMT  
 PMT Voltage Auto  
 Scan Rate 4  
 Scans 10  
 Solvent MeOH  
 Concentration 0.5 (w/v)%

[Detailed Information]

Creation date 2021/7/15 14:27  
 Data array type Linear data array \*3  
 Wavelength [nm] Wavelength [nm]  
 Vertical axis(1) Molar CD  
 Vertical axis(2) HT [V]  
 Vertical axis(3) Abs  
 Start 400 nm  
 End 200 nm  
 Data interval 0.5 nm  
 Data points 401
